# Supplementary material for: Antibiotics-induced monodominance of a novel gut bacterial order
Source: Gut. 2019 Jan 18;68(10):1781–90. doi: 10.1136/gutjnl-2018-317715 (PMC6839795; doi:10.1136/gutjnl-2018-317715)
Supplement: Supplementary file 3 [file gutjnl-2018-317715supp003.xlsx]

## Sheet: Tabelle1
	Genes of interest
	Function	Subsystem
Maltose	Maltose O-acetyltransferase (EC 2.3.1.79)	Maltose and Maltodextrin Utilization
Maltodextrin	Maltose/maltodextrin ABC transporter, permease protein MalG	Maltose and Maltodextrin Utilization
	Maltose phosphorylase (EC 2.4.1.8) / Trehalose phosphorylase (EC 2.4.1.64)	Maltose and Maltodextrin Utilization; <br>Trehalose Biosynthesis; <br>Trehalose Uptake and Utilization
Lactose	Galactose-1-phosphate uridylyltransferase (EC 2.7.7.10)	Lactose and Galactose Uptake and Utilization
Galactose	Galactoside O-acetyltransferase (EC 2.3.1.18)	Lactose utilization
	Beta-galactosidase (EC 3.2.1.23)	Galactosylceramide and Sulfatide metabolism; <br>Lactose and Galactose Uptake and Utilization; <br>Lactose utilization
	Alpha-galactosidase (EC 3.2.1.22)	Fructooligosaccharides(FOS) and Raffinose Utilization; <br>Galactosylceramide and Sulfatide metabolism; <br>Lactose and Galactose Uptake and Utilization
	Aldose 1-epimerase (EC 5.1.3.3)	Lactose and Galactose Uptake and Utilization; <br>Maltose and Maltodextrin Utilization
	Galactokinase (EC 2.7.1.6)	Lactose and Galactose Uptake and Utilization
	UDP-glucose 4-epimerase (EC 5.1.3.2)	Lactose and Galactose Uptake and Utilization
Mannose	Mannose-6-phosphate isomerase (EC 5.3.1.8)	Mannose Metabolism
	Phosphomannomutase (EC 5.4.2.8)	Mannose Metabolism
	Beta-mannosidase (EC 3.2.1.25)	Mannose Metabolism
	Alpha-mannosidase (EC 3.2.1.24)	Fructooligosaccharides(FOS) and Raffinose Utilization; <br>Mannose Metabolism
Sucrose	Fructokinase (EC 2.7.1.4)	Sucrose utilization
	Sucrose-6-phosphate hydrolase (EC 3.2.1.26)	Fructooligosaccharides(FOS) and Raffinose Utilization; <br>Sucrose utilization
	Sucrose-6-phosphate hydrolase (EC 3.2.1.B3)	- none -
Xylose	Xylose ABC transporter, permease component	Xylose utilization
	Xylose ABC transporter, substrate-binding component	Xylose utilization
	Xyloside transporter XynT	Xylose utilization
	predicted xylose isomerase	Xylose utilization
	Xylose-responsive transcription regulator, ROK family	Xylose utilization
	Endo-1,4-beta-xylanase A precursor (EC 3.2.1.8)	Xylose utilization
	Xylulose kinase (EC 2.7.1.17)	Xylose utilization
	predicted xylose isomerase	Xylose utilization
L-Rhamnose	Alfa-L-rhamnosidase (EC 3.2.1.40)	- none -
	L-rhamnose isomerase (EC 5.3.1.14)	- none -
	Transcriptional regulator of rhamnose utilization, DeoR family	- none -
	Predicted alpha-L-rhamnosidase	- none -
	Rhamnulokinase (EC 2.7.1.5)	- none -
	L-rhamnose mutarotase	- none -
	Predicted rhamnose oligosaccharide ABC transport system, substrate-binding component	- none -
FOS Raffinose	Beta-glucosidase (EC 3.2.1.21)	Fructooligosaccharides(FOS) and Raffinose Utilization
	Alpha-galactosidase (EC 3.2.1.22)	Fructooligosaccharides(FOS) and Raffinose Utilization; <br>Galactosylceramide and Sulfatide metabolism; <br>Lactose and Galactose Uptake and Utilization
	Multiple sugar ABC transporter, ATP-binding protein	Fructooligosaccharides(FOS) and Raffinose Utilization; <br>Maltose and Maltodextrin Utilization
	Multiple sugar ABC transporter, substrate-binding protein	Fructooligosaccharides(FOS) and Raffinose Utilization
	Multiple sugar ABC transporter, membrane-spanning permease protein MsmG	Fructooligosaccharides(FOS) and Raffinose Utilization
	Alpha-mannosidase (EC 3.2.1.24)	Fructooligosaccharides(FOS) and Raffinose Utilization; <br>Mannose Metabolism
	Multiple sugar ABC transporter, membrane-spanning permease protein MsmF	Fructooligosaccharides(FOS) and Raffinose Utilization
	Sucrose-6-phosphate hydrolase (EC 3.2.1.26)	Fructooligosaccharides(FOS) and Raffinose Utilization; <br>Sucrose utilization
Trehalose	Maltose phosphorylase (EC 2.4.1.8) / Trehalose phosphorylase (EC 2.4.1.64)	Maltose and Maltodextrin Utilization; <br>Trehalose Biosynthesis; <br>Trehalose Uptake and Utilization
	Trehalase (EC 3.2.1.28); Periplasmic trehalase precursor (EC 3.2.1.28)	Trehalose Uptake and Utilization
	1,4-alpha-glucan (glycogen) branching enzyme, GH-13-type (EC 2.4.1.18)	Glycogen metabolism; <br>Trehalose Biosynthesis
	Beta-phosphoglucomutase (EC 5.4.2.6)	Maltose and Maltodextrin Utilization; <br>Trehalose Uptake and Utilization

## Sheet: Legend
Suppl. Table 1: Metabolic pathways used to guide cultivation. UB. ceftriaxensis functional annotation to RAST pathways were used to select media from which to culture UB. ceftriaxensis from stool samples.
