# Supplementary material for: Antibiotics-induced monodominance of a novel gut bacterial order
Source: Gut. 2019 Jan 18;68(10):1781–90. doi: 10.1136/gutjnl-2018-317715 (PMC6839795; doi:10.1136/gutjnl-2018-317715)
Supplement: Supplementary file 5 [file gutjnl-2018-317715supp005.xlsx]

## Sheet: Sheet1
Bin		Id_Marker	lineage#	genomes#	markers#	markersets	0	1	2	3	4	5+	Completeness	Contamination	Strain_heterogeneity
UBorkfalki ceftriaxenesis		c__Clostridia	(UID1118)	387	223	124	9	210	4	0	0	0	94.76	2.45	0
Parabacteroides distasonis		o__Bacteroidales	(UID2621)	198	427	260	2	424	1	0	0	0	99.42	0.38	0
CAG314		c__Clostridia	(UID1118)	387	223	124	9	213	1	0	0	0	93.95	0.81	0
CAG349		o__Clostridiales	(UID1120)	304	250	143	16	233	1	0	0	0	92.64	0.7	0
CAG727		c__Clostridia	(UID1118)	387	223	124	20	201	2	0	0	0	90.23	1.61	0
Mean_close_references									1.33333	0	0	0	92.2733	1.04	0
Mean Ref Genomes									2.27426	0.0675105	0.0421941	0	98.187	1.29241	6.62869
SD Ref Genomes									6.9547	0.361197	0.408651	0	4.02609	6.37818	21.1988
RefGenome (NCBI TaxID)
883110		o__Lactobacillales	(UID355)	490	329	180	0	329	0	0	0	0	100	0	0
762051		f__Leuconostocaceae	(UID486)	29	443	178	0	443	0	0	0	0	100	0	0
650150		k__Bacteria	(UID2372)	131	175	104	0	175	0	0	0	0	100	0	0
645991		c__Clostridia	(UID1085)	35	420	196	0	418	2	0	0	0	100	0.34	0
558169		c__Bacilli	(UID256)	765	274	150	0	273	1	0	0	0	100	0.33	0
500635		f__Veillonellaceae	(UID1032)	33	423	214	0	421	2	0	0	0	100	0.31	0
500633		o__Clostridiales	(UID1120)	304	250	143	0	250	0	0	0	0	100	0	0
498761		c__Clostridia	(UID1085)	35	420	196	0	417	3	0	0	0	100	0.89	0
469596		k__Bacteria	(UID2372)	131	177	106	0	174	3	0	0	0	100	1.89	0
428126		k__Bacteria	(UID2372)	131	177	106	0	177	0	0	0	0	100	0	0
370438		p__Firmicutes	(UID1022)	100	295	158	0	294	1	0	0	0	100	0.63	0
272623		o__Lactobacillales	(UID543)	294	472	265	0	472	0	0	0	0	100	0	0
262543		c__Bacilli	(UID259)	750	273	152	0	273	0	0	0	0	100	0	0
246194		p__Firmicutes	(UID1022)	100	295	158	0	295	0	0	0	0	100	0	0
1488		g__Clostridium	(UID1380)	44	404	145	0	404	0	0	0	0	100	0	0
1443120		g__Clostridium	(UID1380)	44	404	145	0	403	1	0	0	0	100	0.69	0
1410661		o__Clostridiales	(UID1212)	172	263	149	0	263	0	0	0	0	100	0	0
1410658		k__Bacteria	(UID2372)	131	177	106	0	177	0	0	0	0	100	0	0
1408422		o__Clostridiales	(UID1120)	304	248	141	0	247	1	0	0	0	100	0.35	0
1401067		o__Selenomonadales	(UID1024)	64	334	167	0	333	1	0	0	0	100	0.6	0
1291050		o__Clostridiales	(UID1212)	172	260	148	0	259	1	0	0	0	100	0.34	0
1280706		f__Veillonellaceae	(UID1032)	33	423	214	0	422	1	0	0	0	100	0.08	0
1238184		c__Bacilli	(UID256)	765	274	150	0	273	1	0	0	0	100	0.22	0
1211844		k__Bacteria	(UID2372)	131	177	106	0	177	0	0	0	0	100	0	0
1123263		k__Bacteria	(UID2372)	131	176	105	0	176	0	0	0	0	100	0	0
1122217		p__Firmicutes	(UID1022)	100	295	158	0	294	1	0	0	0	100	0.63	0
1121468		p__Firmicutes	(UID1022)	100	295	158	0	293	2	0	0	0	100	1.27	50
1121315		o__Clostridiales	(UID1120)	304	249	142	0	249	0	0	0	0	100	0	0
1120985		p__Firmicutes	(UID1022)	100	295	158	0	294	1	0	0	0	100	0.63	0
1048834		p__Firmicutes	(UID242)	830	239	127	0	238	1	0	0	0	100	0.79	0
1041504		p__Firmicutes	(UID240)	1318	175	101	0	174	1	0	0	0	100	0.99	0
1035308		k__Bacteria	(UID203)	5449	103	58	0	2	101	0	0	0	100	97.41	0
1035196		o__Clostridiales	(UID1120)	304	250	143	0	250	0	0	0	0	100	0	0
1002809		c__Bacilli	(UID259)	750	275	151	0	274	1	0	0	0	100	0.22	0
591001		o__Selenomonadales	(UID1024)	64	334	167	1	333	0	0	0	0	99.98	0	0
1444177		f__Enterobacteriaceae	(UID5124)	134	1173	336	1	1169	2	1	0	0	99.97	0.63	80
484770		p__Firmicutes	(UID1022)	100	295	158	1	288	6	0	0	0	99.91	3.48	16.67
1123511		p__Firmicutes	(UID1022)	100	295	158	1	282	6	0	6	0	99.91	3.16	90.48
910314		p__Firmicutes	(UID1022)	100	286	151	1	284	1	0	0	0	99.91	0.33	0
887929		o__Clostridiales	(UID1120)	304	249	142	1	246	2	0	0	0	99.88	1.06	0
1200792		f__Paenibacillaceae	(UID971)	46	481	186	1	478	2	0	0	0	99.73	1.08	0
1000569		o__Selenomonadales	(UID1024)	64	334	167	1	333	0	0	0	0	99.7	0	0
1123226		f__Paenibacillaceae	(UID972)	41	523	183	2	521	0	0	0	0	99.68	0	0
1408423		p__Firmicutes	(UID1022)	100	295	158	2	287	6	0	0	0	99.66	2.58	0
592026		o__Clostridiales	(UID1212)	172	263	149	2	259	2	0	0	0	99.55	1.34	0
935948		o__Thermoanaerobacterales	(UID1420)	32	488	209	1	487	0	0	0	0	99.52	0	0
697303		o__Thermoanaerobacterales	(UID1420)	32	488	209	1	487	0	0	0	0	99.52	0	0
632292		o__Thermoanaerobacterales	(UID1420)	32	488	209	1	487	0	0	0	0	99.52	0	0
580331		o__Thermoanaerobacterales	(UID1420)	32	488	209	1	487	0	0	0	0	99.52	0	0
1410627		f__Lachnospiraceae	(UID1286)	57	420	207	1	419	0	0	0	0	99.52	0	0
140626		f__Lachnospiraceae	(UID1286)	57	420	207	1	409	5	4	1	0	99.52	5.31	95.65
1280688		f__Lachnospiraceae	(UID1286)	57	420	207	1	419	0	0	0	0	99.52	0	0
1496		s__difficile	(UID1169)	60	1183	308	6	1175	2	0	0	0	99.51	0.37	0
351627		o__Thermoanaerobacterales	(UID1420)	32	488	209	2	486	0	0	0	0	99.5	0	0
635013		c__Clostridia	(UID1085)	35	420	196	1	416	3	0	0	0	99.49	1.28	0
1449337		o__Lactobacillales	(UID355)	490	334	183	1	329	4	0	0	0	99.45	1.29	0
1121105		o__Lactobacillales	(UID355)	490	333	183	1	332	0	0	0	0	99.45	0	0
908337		o__Lactobacillales	(UID355)	490	326	181	1	324	1	0	0	0	99.45	0.55	0
525367		c__Bacilli	(UID285)	586	325	181	1	323	1	0	0	0	99.45	0.14	0
1122143		o__Lactobacillales	(UID355)	490	326	181	1	323	2	0	0	0	99.45	0.74	0
1295642		f__Bacillaceae	(UID830)	27	604	178	1	601	2	0	0	0	99.44	0.33	0
1229783		c__Bacilli	(UID285)	586	319	176	1	318	0	0	0	0	99.43	0	0
1123230		c__Bacilli	(UID285)	586	316	174	1	314	1	0	0	0	99.43	0.29	0
411461		f__Lachnospiraceae	(UID1256)	33	333	171	1	332	0	0	0	0	99.42	0	0
410072		f__Lachnospiraceae	(UID1256)	33	333	171	1	332	0	0	0	0	99.42	0	0
1121917		f__Bacillaceae	(UID829)	128	523	171	1	522	0	0	0	0	99.42	0	0
580327		o__Thermoanaerobacterales	(UID1420)	32	488	209	2	485	0	1	0	0	99.4	0.48	33.33
1069080		o__Selenomonadales	(UID1024)	64	334	167	1	332	1	0	0	0	99.4	0.3	0
491915		f__Bacillaceae	(UID830)	27	604	178	2	601	1	0	0	0	99.4	0.56	0
702450		c__Bacilli	(UID285)	586	302	166	1	300	1	0	0	0	99.4	0.6	0
525282		o__Clostridiales	(UID1125)	128	313	164	1	312	0	0	0	0	99.39	0	0
1123500		o__Lactobacillales	(UID375)	177	350	163	1	349	0	0	0	0	99.39	0	0
862514		o__Lactobacillales	(UID462)	85	367	162	1	366	0	0	0	0	99.38	0	0
1138822		o__Lactobacillales	(UID463)	75	376	160	1	374	1	0	0	0	99.38	0.62	0
511145		f__Enterobacteriaceae	(UID5124)	134	1173	336	3	1169	1	0	0	0	99.37	0.04	0
936596		o__Clostridiales	(UID1226)	155	278	158	1	277	0	0	0	0	99.37	0	0
868595		p__Firmicutes	(UID1022)	100	295	158	1	294	0	0	0	0	99.37	0	0
180332		o__Clostridiales	(UID1226)	155	278	158	1	275	2	0	0	0	99.37	0.95	0
1121472		p__Firmicutes	(UID1022)	100	295	158	1	294	0	0	0	0	99.37	0	0
1009370		p__Firmicutes	(UID1022)	100	295	158	2	288	5	0	0	0	99.37	3.16	0
33035		o__Clostridiales	(UID1226)	155	274	157	1	273	0	0	0	0	99.36	0	0
1232451		o__Clostridiales	(UID1226)	155	278	158	2	274	2	0	0	0	99.35	0.95	0
1078085		c__Bacilli	(UID259)	750	276	152	1	273	2	0	0	0	99.34	0.44	0
981383		c__Bacilli	(UID256)	765	274	151	1	271	2	0	0	0	99.34	0.88	0
1526927		c__Bacilli	(UID259)	750	275	151	1	274	0	0	0	0	99.34	0	0
1347087		c__Bacilli	(UID256)	765	274	151	1	270	3	0	0	0	99.34	1.32	0
1273538		c__Bacilli	(UID259)	750	275	151	1	271	1	2	0	0	99.34	1.55	85.71
1235279		c__Bacilli	(UID259)	750	275	151	1	272	2	0	0	0	99.34	0.99	0
1227360		c__Bacilli	(UID259)	750	275	151	1	273	1	0	0	0	99.34	0.66	0
1123359		c__Bacilli	(UID284)	725	279	151	1	278	0	0	0	0	99.34	0	0
1033738		c__Bacilli	(UID259)	750	275	151	1	264	9	1	0	0	99.34	4.47	8.33
1230341		c__Bacilli	(UID256)	765	274	150	1	272	1	0	0	0	99.33	0.67	0
45851		o__Clostridiales	(UID1212)	172	263	149	1	261	1	0	0	0	99.33	0.67	0
411490		o__Clostridiales	(UID1212)	172	263	149	1	259	1	1	1	0	99.33	4.03	30
411474		o__Clostridiales	(UID1212)	172	263	149	1	262	0	0	0	0	99.33	0	0
40518		o__Clostridiales	(UID1212)	172	263	149	1	259	3	0	0	0	99.33	1.68	33.33
1515		o__Clostridiales	(UID1212)	172	263	149	1	261	1	0	0	0	99.33	0.67	0
1123290		c__Bacilli	(UID259)	750	271	149	1	267	3	0	0	0	99.33	0.62	0
1007096		o__Clostridiales	(UID1212)	172	263	149	1	261	1	0	0	0	99.33	0.34	0
509191		o__Clostridiales	(UID1212)	172	262	148	1	252	9	0	0	0	99.32	4.39	0
394503		o__Clostridiales	(UID1212)	172	260	148	1	257	2	0	0	0	99.32	1.01	50
742735		o__Clostridiales	(UID1342)	32	340	177	2	338	0	0	0	0	99.32	0	0
246199		o__Clostridiales	(UID1212)	172	260	146	1	259	0	0	0	0	99.32	0	0
1509		g__Clostridium	(UID1380)	44	404	145	1	400	3	0	0	0	99.31	2.07	0
1491		g__Clostridium	(UID1380)	44	404	145	1	403	0	0	0	0	99.31	0	0
888060		f__Veillonellaceae	(UID1033)	26	623	289	2	620	1	0	0	0	99.31	0.05	0
1286171		o__Clostridiales	(UID1120)	304	250	143	2	245	3	0	0	0	99.3	2.1	0
445973		o__Clostridiales	(UID1120)	304	249	142	1	248	0	0	0	0	99.3	0	0
1121289		o__Clostridiales	(UID1120)	304	249	142	1	248	0	0	0	0	99.3	0	0
1068975		o__Clostridiales	(UID1120)	304	249	142	1	245	3	0	0	0	99.3	0.75	0
84022		o__Clostridiales	(UID1120)	304	248	141	1	246	1	0	0	0	99.29	0.71	0
1410638		o__Clostridiales	(UID1120)	304	247	141	1	246	0	0	0	0	99.29	0	0
657318		f__Lachnospiraceae	(UID1286)	57	420	207	2	415	3	0	0	0	99.28	1.21	0
39491		f__Lachnospiraceae	(UID1286)	57	420	207	2	418	0	0	0	0	99.28	0	0
565653		o__Lactobacillales	(UID544)	293	473	265	2	471	0	0	0	0	99.25	0	0
1123252		p__Firmicutes	(UID242)	830	245	130	1	239	5	0	0	0	99.23	2.76	0
649747		f__Paenibacillaceae	(UID971)	46	481	186	3	467	11	0	0	0	99.22	2.69	0
941824		c__Clostridia	(UID1118)	387	223	124	1	220	2	0	0	0	99.19	1.61	100
857293		c__Clostridia	(UID1118)	387	223	124	1	219	3	0	0	0	99.19	1.28	66.67
1520		o__Clostridiales	(UID1375)	50	332	124	1	329	2	0	0	0	99.19	1.61	0
1502		o__Clostridiales	(UID1375)	50	332	124	1	331	0	0	0	0	99.19	0	0
1492		o__Clostridiales	(UID1375)	50	332	124	1	331	0	0	0	0	99.19	0	0
883103		o__Lactobacillales	(UID355)	490	336	184	2	329	5	0	0	0	99.18	2.45	0
1246484		c__Bacilli	(UID256)	765	274	150	2	271	0	1	0	0	99.17	1.33	33.33
500632		o__Clostridiales	(UID1226)	155	278	158	2	273	3	0	0	0	99.16	1.16	33.33
926561		p__Firmicutes	(UID241)	930	207	115	1	204	2	0	0	0	99.13	1.16	0
656519		p__Firmicutes	(UID241)	930	209	115	1	205	3	0	0	0	99.13	2.17	0
373903		p__Firmicutes	(UID241)	930	207	114	1	204	2	0	0	0	99.12	0.88	100
1308866		c__Bacilli	(UID256)	765	274	151	2	269	3	0	0	0	99.12	1.21	0
66219		o__Clostridiales	(UID1212)	172	263	149	2	256	5	0	0	0	99.11	3.36	0
1341151		p__Firmicutes	(UID242)	830	245	130	2	238	5	0	0	0	99.08	2.76	0
1329516		p__Firmicutes	(UID242)	830	245	130	2	239	4	0	0	0	99.08	1.22	0
1410674		k__Bacteria	(UID2372)	131	177	106	3	173	1	0	0	0	99.06	0.94	0
904296		o__Clostridiales	(UID1226)	155	276	157	2	273	1	0	0	0	99.04	0.32	100
273068		o__Thermoanaerobacterales	(UID1420)	32	488	209	2	484	2	0	0	0	99.04	0.6	0
1051632		p__Firmicutes	(UID239)	1324	170	100	1	169	0	0	0	0	99	0	0
693746		o__Clostridiales	(UID1212)	172	263	149	2	259	2	0	0	0	98.99	1.01	0
1161902		o__Clostridiales	(UID1120)	304	247	141	2	245	0	0	0	0	98.94	0	0
655812		o__Lactobacillales	(UID355)	490	327	182	2	321	4	0	0	0	98.9	1.65	25
1408226		c__Bacilli	(UID285)	586	325	181	2	321	2	0	0	0	98.9	0.55	0
643648		c__Clostridia	(UID1085)	35	420	196	3	416	1	0	0	0	98.81	0.51	0
718255		f__Lachnospiraceae	(UID1286)	57	420	207	5	411	4	0	0	0	98.78	0.85	0
936574		f__Lachnospiraceae	(UID1286)	57	420	207	6	412	2	0	0	0	98.74	0.29	0
796942		o__Clostridiales	(UID1226)	155	278	158	4	273	1	0	0	0	98.73	0.63	0
478749		o__Clostridiales	(UID1226)	155	278	158	2	275	1	0	0	0	98.73	0.16	0
756499		c__Clostridia	(UID1085)	35	420	196	3	408	8	0	1	0	98.72	3.98	0
586416		c__Bacilli	(UID256)	765	275	151	2	272	1	0	0	0	98.68	0.22	0
1196324		c__Bacilli	(UID257)	764	275	151	3	272	0	0	0	0	98.68	0	0
1160707		c__Bacilli	(UID259)	750	275	151	2	272	1	0	0	0	98.68	0.66	0
1121936		c__Bacilli	(UID256)	765	274	150	2	269	3	0	0	0	98.67	0.89	0
398512		o__Clostridiales	(UID1212)	172	263	149	2	247	13	0	1	0	98.66	7.27	0
1385510		c__Bacilli	(UID256)	765	273	149	2	270	1	0	0	0	98.66	0.67	0
1235835		o__Clostridiales	(UID1212)	172	263	149	3	260	0	0	0	0	98.66	0	0
1203606		o__Clostridiales	(UID1212)	172	263	149	2	261	0	0	0	0	98.66	0	0
1123239		c__Bacilli	(UID257)	764	269	149	2	266	1	0	0	0	98.66	0.22	0
1122203		c__Bacilli	(UID257)	764	270	149	2	266	2	0	0	0	98.66	1.34	0
979226		f__Paenibacillaceae	(UID971)	46	481	186	3	478	0	0	0	0	98.66	0	0
717605		f__Paenibacillaceae	(UID971)	46	481	186	3	478	0	0	0	0	98.66	0	0
1410632		o__Clostridiales	(UID1212)	172	261	148	3	258	0	0	0	0	98.65	0	0
718252		o__Clostridiales	(UID1212)	172	261	147	3	258	0	0	0	0	98.64	0	0
1347392		o__Clostridiales	(UID1120)	304	250	143	2	245	3	0	0	0	98.6	2.1	0
1156417		o__Clostridiales	(UID1120)	304	250	143	3	246	1	0	0	0	98.6	0.35	0
445971		o__Clostridiales	(UID1120)	304	249	142	2	245	2	0	0	0	98.59	1.41	0
1304284		o__Clostridiales	(UID1120)	304	249	142	2	247	0	0	0	0	98.59	0	0
861450		o__Selenomonadales	(UID1024)	64	334	167	5	328	1	0	0	0	98.56	0.07	0
1392491		o__Clostridiales	(UID1120)	304	247	141	4	243	0	0	0	0	98.56	0	0
1089553		p__Firmicutes	(UID1022)	100	295	158	3	292	0	0	0	0	98.52	0	0
930946		o__Lactobacillales	(UID374)	471	350	191	4	346	0	0	0	0	98.52	0	0
1262915		o__Selenomonadales	(UID1024)	64	334	167	4	328	2	0	0	0	98.48	0.72	0
411465		o__Clostridiales	(UID1125)	128	313	164	4	304	5	0	0	0	98.48	1.02	0
997346		p__Firmicutes	(UID242)	830	245	130	4	238	3	0	0	0	98.46	1.41	0
1120973		p__Firmicutes	(UID242)	830	245	130	3	237	5	0	0	0	98.46	3.33	0
592010		o__Lactobacillales	(UID355)	490	335	184	4	331	0	0	0	0	98.46	0	0
1395513		p__Firmicutes	(UID242)	830	244	129	2	241	1	0	0	0	98.45	0.39	0
1336234		o__Lactobacillales	(UID355)	490	333	183	3	330	0	0	0	0	98.36	0	0
1229520		o__Lactobacillales	(UID355)	490	334	183	9	322	3	0	0	0	98.36	1	0
1234409		c__Bacilli	(UID285)	586	325	181	4	319	2	0	0	0	98.34	0.74	0
1121024		o__Lactobacillales	(UID355)	490	326	181	3	320	3	0	0	0	98.34	0.85	0
457570		p__Firmicutes	(UID241)	930	213	118	2	209	2	0	0	0	98.31	1.69	0
679200		o__Clostridiales	(UID1226)	155	277	157	4	273	0	0	0	0	98.3	0	0
747365		k__Bacteria	(UID203)	5449	104	58	1	102	1	0	0	0	98.28	1.72	0
212717		g__Clostridium	(UID1380)	44	404	145	5	396	3	0	0	0	98.28	0.14	0
926692		p__Firmicutes	(UID241)	930	207	115	2	201	4	0	0	0	98.26	2.39	75
1123405		p__Firmicutes	(UID242)	830	244	129	3	240	1	0	0	0	98.26	0.26	0
748449		p__Firmicutes	(UID241)	930	204	113	2	202	0	0	0	0	98.23	0	0
1259795		k__Bacteria	(UID203)	5449	102	56	1	101	0	0	0	0	98.21	0	0
1280390		f__Paenibacillaceae	(UID971)	46	481	186	4	471	6	0	0	0	98.12	0.56	0
1123313		k__Bacteria	(UID2372)	131	177	106	2	165	8	2	0	0	98.11	4.85	50
1050201		k__Bacteria	(UID2372)	131	177	106	2	170	5	0	0	0	98.11	2.29	0
679192		k__Bacteria	(UID2372)	131	176	105	2	174	0	0	0	0	98.1	0	0
477974		p__Firmicutes	(UID1022)	100	293	157	3	288	2	0	0	0	98.09	0.32	0
292459		p__Firmicutes	(UID239)	1324	175	101	2	172	1	0	0	0	98.02	0.03	0
1461582		c__Bacilli	(UID285)	586	316	174	4	309	3	0	0	0	97.99	1.34	0
642492		o__Clostridiales	(UID1212)	172	263	149	3	255	5	0	0	0	97.99	3.36	0
445972		o__Clostridiales	(UID1212)	172	263	149	3	259	1	0	0	0	97.99	0.22	0
697281		c__Clostridia	(UID1118)	387	223	124	3	217	3	0	0	0	97.98	1.48	0
411471		o__Clostridiales	(UID1212)	172	261	147	3	258	0	0	0	0	97.96	0	0
1540257		g__Clostridium	(UID1380)	44	404	145	3	387	13	1	0	0	97.93	6.15	37.5
546269		o__Clostridiales	(UID1120)	304	250	143	3	246	1	0	0	0	97.9	0.7	100
1357384		o__Clostridiales	(UID1120)	304	250	143	3	242	5	0	0	0	97.9	3.5	60
518637		k__Bacteria	(UID2372)	131	177	106	4	167	6	0	0	0	97.84	1.11	0
1089548		p__Firmicutes	(UID242)	830	245	130	3	240	2	0	0	0	97.69	1.54	0
562983		c__Bacilli	(UID285)	586	318	174	6	312	0	0	0	0	97.51	0	0
574087		p__Firmicutes	(UID241)	930	208	116	3	205	0	0	0	0	97.41	0	0
1403537		c__Clostridia	(UID1118)	387	223	124	4	218	1	0	0	0	97.38	0.81	100
335541		c__Clostridia	(UID1085)	35	420	196	6	412	2	0	0	0	97.35	0.21	0
663278		o__Clostridiales	(UID1212)	172	263	149	4	258	1	0	0	0	97.32	0.34	0
883081		o__Lactobacillales	(UID355)	490	336	184	12	323	1	0	0	0	97.28	0.54	0
1121126		c__Bacilli	(UID285)	586	325	181	8	315	2	0	0	0	97.15	0.33	50
545696		k__Bacteria	(UID2372)	131	176	105	3	172	1	0	0	0	97.14	0.95	0
1209989		p__Firmicutes	(UID240)	1318	179	104	4	174	1	0	0	0	97.08	0.96	0
1157490		p__Firmicutes	(UID242)	830	245	130	5	230	10	0	0	0	96.92	5.77	0
1304880		c__Clostridia	(UID1118)	387	223	124	5	216	2	0	0	0	96.75	1.21	0
401526		p__Firmicutes	(UID1022)	100	294	158	8	285	1	0	0	0	96.52	0.63	0
458233		c__Bacilli	(UID285)	586	325	181	8	315	2	0	0	0	96.13	1.1	0
698769		c__Bacilli	(UID256)	765	274	150	7	265	2	0	0	0	96	0.69	0
1120978		o__Lactobacillales	(UID355)	490	336	184	9	327	0	0	0	0	95.86	0	0
561177		o__Clostridiales	(UID1125)	128	313	164	11	300	1	1	0	0	95.83	1.52	0
555088		p__Firmicutes	(UID241)	930	213	118	8	203	2	0	0	0	95.76	1.13	0
1090974		o__Lactobacillales	(UID544)	293	475	267	16	459	0	0	0	0	95.7	0	0
6.66667e+06		c__Clostridia	(UID1118)	387	223	124	8	211	4	0	0	0	95.56	2.45	0
555079		p__Firmicutes	(UID240)	1318	179	104	5	174	0	0	0	0	95.19	0	0
562970		p__Firmicutes	(UID242)	830	240	127	7	230	3	0	0	0	95.01	1.31	0
1131935		f__Paenibacillaceae	(UID972)	41	523	183	63	457	3	0	0	0	94.11	0.51	0
986075		p__Firmicutes	(UID242)	830	245	130	11	232	2	0	0	0	93.85	1.54	0
1536651		c__Clostridia	(UID1085)	35	420	196	27	369	24	0	0	0	93.82	5.49	66.67
699246		o__Clostridiales	(UID1120)	304	247	141	12	234	1	0	0	0	93.74	0.71	0
562743		c__Bacilli	(UID256)	765	274	151	13	259	2	0	0	0	92.72	0.88	0
1121947		o__Clostridiales	(UID1125)	128	313	164	15	297	1	0	0	0	91.92	0.61	0
997350		o__Clostridiales	(UID1120)	304	250	143	16	234	0	0	0	0	91.49	0	0
1232430		c__Bacilli	(UID285)	586	325	181	23	300	2	0	0	0	90.15	0.55	0
626369		o__Lactobacillales	(UID355)	490	333	183	38	295	0	0	0	0	88.52	0	0
1410668		o__Clostridiales	(UID1375)	50	332	124	30	296	5	1	0	0	87.3	2.11	0
994573		o__Clostridiales	(UID1375)	50	332	124	31	294	7	0	0	0	86.92	4.1	0
1304884		c__Clostridia	(UID1085)	35	420	196	83	335	2	0	0	0	79.59	0.68	0
717960		k__Bacteria	(UID2372)	131	177	106	42	135	0	0	0	0	72.41	0	0
1410610		f__Lachnospiraceae	(UID1295)	33	543	238	252	290	1	0	0	0	54.62	0.21	0

## Sheet: Caption
Suppl. Table 4: Genome completeness for new metagenomic assembled genomes. Genome completeness of newly assembled species (UB. ceftriaxensis, P. distasonis) and reference genomes from reference Firmicutes database.
