# Supplementary material for: Antibiotics-induced monodominance of a novel gut bacterial order
Source: Gut. 2019 Jan 18;68(10):1781–90. doi: 10.1136/gutjnl-2018-317715 (PMC6839795; doi:10.1136/gutjnl-2018-317715)
Supplement: Supplementary file 7 [file gutjnl-2018-317715supp007.xlsx]

## Sheet: Tabelle1
Distribution of UB. ceftriaxensis across studies	Human							Animals				Environmental
	German	Chinese_Qin et al.	HMP	Internal	MetaHIT	Chinese Feng et al.	Swedish	Cat gut	Pig gut	Dog gut	Mouse gut	Soil	Ocean
Present	86	17	157	36	195	38	30	0	0	0	0	0	0
Absent	108	351	1052	34	192	118	115	124	295	129	191	181	243
Fraction samples	0.443299	0.0461957	0.129859	0.514286	0.503876	0.24359	0.206897	0	0	0	0	0	0
AvgSeqDepth	33063131	25289612	39721578	46478098	37747525	30544403	36052706
	194	368	1209	70	387	156	145	124	295	129	191	181	243
	Average occurrence gastrointestinal studies
	0.348524
HMP-specific
	anteriornares	attachedkeratinizedgingiva	buccalmucosa	keratinizedgingiva	leftretroauricularcrease	lretroauricularcrease	midvagina	palatinetonsils	posteriorfornix	rantecubitalfossa	rightretroauricularcrease	rretroauricularcrease	saliva	stool	subgingivalplaque	supragingivalplaque	throat	tonguedorsum	vaginalintroitus
Detected	2	0	5	0	0	0	0	2	2	0	2	2	0	141	1		0	2	0
Not	130	6	175	8	9	14	2	17	100	1	16	11	7	97	19	205	13	213	8
Detection Rate	0.0151515	0	0.0277778	0	0	0	0	0.105263	0.0196078	0	0.111111	0.153846	0	0.592437	0.05	0	0	0.00930233	0
Average-non gut	0.0257511
Abundance of UB. ceftriaxensis across metagenomic samples, where at least 1/10 mOTU marker genes could be detected.

## Sheet: Caption
Suppl. Table 7: Detection of UB. ceftriaxensis in public samples. Occurrence of UB. ceftriaxensis in global metagenomic samples, as detected with the mOTUs pipeline, where at least 1/10 mOTU marker genes could be detected.
