# Supplementary material for: Antibiotics-induced monodominance of a novel gut bacterial order
Source: Gut. 2019 Jan 18;68(10):1781–90. doi: 10.1136/gutjnl-2018-317715 (PMC6839795; doi:10.1136/gutjnl-2018-317715)
Supplement: Supplementary file 8 [file gutjnl-2018-317715supp008.xlsx]

## Sheet: Tabelle1
SampleID	Alias	Study Accession (EBI)	SampleName		NewlyUploaded
DK.S2.T0	MH0272	PRJEB4336	SAMEA2156714
DK.S1.T0	MH0037	PRJEB4336	SAMEA2143295
DK.S3.T0	MH0424	PRJEB4336	SAMEA2145815
ES.S1.T0	O2.UC18-2	PRJEB1220	SAMEA2042838
ES.S2.T0	V1.UC11-5	PRJEB1220	SAMEA2042406
ES.S3.T0	V1.UC13-3	PRJEB1220	SAMEA2042440
DK.S4.T0	MH0431	PRJEB4336	SAMEA2161597
SWE.S1.T0	NG-5636_628	PRJEB1786	SAMEA1906556
HD.S5.T0	CCMD11006829ST-21-0	PRJEB6070	SAMEA2467066
StL.S8.T100	764002286-stool2	PRJNA48479	SAMN00037072
HOU.S4.T100	159005010-stool2	PRJNA48479	SAMN00044801
StL.S6.T342	763860675-stool2	PRJNA48479	SAMN00070934
StL.S11.T398	764649650-stool2	PRJNA48479	SAMN00100025
StL.S15.T238	765640925-stool2	PRJNA48479	SAMN00146869
StL.S6.T0	763860675-stool1	PRJNA48479	SAMN00036141
StL.S11.T0	764649650-stool1	PRJNA48479	SAMN00037421
StL.S15.T0	765640925-stool1	PRJNA48479	SAMN00070761
HOU.S3.T407	158802708-stool3	PRJNA48479	SAMN00088016
HOU.S3.T248	158802708-stool2	PRJNA48479	SAMN00044744
HOU.S5.T217	159247771-stool2	PRJNA48479	SAMN00045227
HOU.S5.T0	159247771-stool1	PRJNA48479	SAMN00032842
HOU.S7.T370	160502038-stool3	PRJNA48479	SAMN00139709
HOU.S7.T203	160502038-stool2	PRJNA48479	SAMN00069411
HOU.S7.T0	160502038-stool1	PRJNA48479	SAMN00038739
HOU.S8.T189	160603188-stool2	PRJNA48479	SAMN00078079
HOU.S8.T0	160603188-stool1	PRJNA48479	SAMN00039039
HOU.S9.T0	160704339-stool1	PRJNA48479	SAMN00041546
HOU.S10.T0	161412393-stool2	PRJNA48479	SAMN00073365
StL.S2.T0	763456073-stool3	PRJNA48479	SAMN00086130
StL.S3.T390	763536994-stool3	PRJNA48479	SAMN00081451
StL.S5.T407	763820215-stool3	PRJNA48479	SAMN00087502
StL.S5.T349	763820215-stool2	PRJNA48479	SAMN00078732
StL.S5.T0	763820215-stool1	PRJNA48479	SAMN00035531
StL.S7.T376	763982056-stool3	PRJNA48479	SAMN00087253
StL.S7.T302	763982056-stool2	PRJNA48479	SAMN00070308
StL.S7.T0	763982056-stool1	PRJNA48479	SAMN00036482
StL.S8.T0	764002286-stool1	PRJNA48479	SAMN00037072
StL.S9.T341	764042746-stool2	PRJNA48479	SAMN00083581
StL.S9.T0	764042746-stool1	PRJNA48479	SAMN00036587
HOU.S11.T0	809635352-stool1	PRJNA48479	SAMN00043742
HOU.S1.T245	158337416-stool2	PRJNA48479	SAMN00043289
HOU.S1.T0	158337416-stool1	PRJNA48479	SAMN00033491
HOU.S2.T0	158479027-stool1	PRJNA48479	SAMN00032521
HOU.S3.T0	158802708-stool1	PRJNA48479	SAMN00032708
HOU.S3.T0	158802708-stool1	PRJNA48479	SAMN00032708
HOU.S4.T0	159005010-stool1	PRJNA48479	SAMN00044801
HOU.S6.T0	160400887-stool1	PRJNA48479	SAMN00041451
StL.S1.T240	508703490-stool3	PRJNA48479	SAMN00146983
StL.S1.T163	508703490-stool2	PRJNA48479	SAMN00099822
StL.S1.T0	508703490-stool1	PRJNA48479	SAMN00073344
StL.S4.T336	763759525-stool2	PRJNA48479	SAMN00063420
StL.S4.T0	763759525-stool1	PRJNA48479	SAMN00036408
StL.S10.T286	764325968-stool2	PRJNA48479	SAMN00076268
StL.S10.T0	764325968-stool1	PRJNA48479	SAMN00037178
StL.S12.T0	765074482-stool1	PRJNA48479	SAMN00037553
StL.S12.T245	765074482-stool2	PRJNA48479	SAMN00069173
StL.S12.T407	765074482-stool3	PRJNA48479	SAMN00142107
StL.S13.T0	765135172-stool1	PRJNA48479	SAMN00040035
StL.S13.T403	765135172-stool3	PRJNA48479	SAMN00142634
StL.S14.T0	765519544-stool3	PRJNA48479	SAMN00146563
HD.S1.T0		ERP009422	see Voigt et al. 2015
HD.S1.T2		ERP009422	see Voigt et al. 2015
HD.S1.T374		ERP009422	see Voigt et al. 2015
HD.S1.T374					yes
HD.S1.T376		ERP009422	see Voigt et al. 2015
HD.S1.T377		ERP009422	see Voigt et al. 2015
HD.S1.T377					yes
HD.S1.T378		ERP009422	see Voigt et al. 2015
HD.S1.T380		ERP009422	see Voigt et al. 2015
HD.S1.T392		ERP009422	see Voigt et al. 2015
HD.S1.T60		ERP009422	see Voigt et al. 2015
HD.S1.T600		ERP009422	see Voigt et al. 2015
HD.S1.T630		PRJEB17632	SAMEA4545452
HD.S1.T632		PRJEB17632	SAMEA4545453
HD.S1.T637		PRJEB17632	SAMEA4545454
HD.S1.T7		ERP009422	see Voigt et al. 2015
HD.S1.T773		PRJEB17632	SAMEA4545455
HD.S1.T877		PRJEB17632	SAMEA4545456
HD.S1.T881		PRJEB17632	SAMEA4545457
HD.S1.T883		PRJEB17632	SAMEA4545458
HD.S1.T895		PRJEB17632	SAMEA4545459
HD.S1.T898		PRJEB17632	SAMEA4545460
HD.S1.T902		PRJEB17632	SAMEA4545461
HD.S1.T904		PRJEB17632	SAMEA4545462
HD.S1.T918		PRJEB17632	SAMEA4545463
HD.S1.T1362					Yes
HD.S2.T0		PRJEB17632	SAMEA4545464
HD.S2.T726					Yes
HD.S2.T741					Yes
HD.S2.T754					Yes
HD.S2.T725					Yes
HD.S2.T737					Yes
HD.S2.T743					Yes
HD.S3.T0		PRJEB17632	SAMEA4545465
HD.S3.T727					Yes
HD.S3.T732					Yes
HD.S3.T734					Yes
HD.S3.T724					Yes
HD.S3.T729					Yes
HD.S3.T733					Yes
HD.S3.T735					Yes
HD.S4.T0		PRJEB17632	SAMEA4545466
HD.S4.T725					Yes
HD.S6.T0		PRJEB17632	SAMEA4545487
HD.S6.T30		PRJEB17632	SAMEA4545488
HD.S6.T7		PRJEB17632	SAMEA4545489
HD.S7.T0		PRJEB17632	SAMEA4545502
HD.S7.T2		PRJEB17632	SAMEA4545503
HD.S7.T392		PRJEB17632	SAMEA4545504
HD.S7.T60		PRJEB17632	SAMEA4545505
HD.S7.T7		PRJEB17632	SAMEA4545506
HD.S7.T773		PRJEB17632	SAMEA4545507
HD.S8.T0		PRJEB17632	SAMEA4545539
HD.S8.T30		PRJEB17632	SAMEA4545540
HD.S8.T7		PRJEB17632	SAMEA4545541
HD.S9.T0		PRJEB17632	SAMEA4545545
HD.S9.T30		PRJEB17632	SAMEA4545546
HD.S9.T7		PRJEB17632	SAMEA4545547
HD.S10.T0		PRJEB17632	SAMEA4545554
ABR.1.0	ERS813907	PRJEB10391	SAMEA3506758
ABR.1.C1	ERS813908	PRJEB10391	SAMEA3506759
ABR.1.C3	ERS813909	PRJEB10391	SAMEA3506760
ABR.1.C6	ERS813910	PRJEB10391	SAMEA3506761
ABR.1.P2	ERS813911	PRJEB10391	SAMEA3506762
ABR.1.P28	ERS813912	PRJEB10391	SAMEA3506763
ABR.2.0	ERS813913	PRJEB10391	SAMEA3506764
ABR.2.C1	ERS813914	PRJEB10391	SAMEA3506765
ABR.2.C3	ERS813915	PRJEB10391	SAMEA3506766
ABR.2.C6	ERS813916	PRJEB10391	SAMEA3506767
ABR.2.P2	ERS813917	PRJEB10391	SAMEA3506768
ABR.2.P28	ERS813918	PRJEB10391	SAMEA3506769

## Sheet: caption
Suppl. Table 6: Samples used in focused data set. This dataset was used to investigate UB. ceftriaxensis distribution patterns. Study accession number is given, newly uploaded metagenomes are indicated and described in Method section.
