# Supplementary material for: Antibiotics-induced monodominance of a novel gut bacterial order
Source: Gut. 2019 Jan 18;68(10):1781–90. doi: 10.1136/gutjnl-2018-317715 (PMC6839795; doi:10.1136/gutjnl-2018-317715)
Supplement: Supplementary file 10 [file gutjnl-2018-317715supp010.xlsx]

## Sheet: ARG
Rank	Feature name	p-value	q-value	Direction
1	lmrC	2.34666e-19	4.81065e-17	1st-AB = 2nd-AB = pre-AB>>>other Subjects>>>post-AB
2	lmrB	3.70457e-18	3.79718e-16	1st-AB = 2nd-AB = pre-AB>>>other Subjects>> post-AB
3	lsaA	2.08824e-16	1.30263e-14	1st-AB = 2nd-AB>>>other Subjects>>>pre-AB = post-AB
4	Listeria_monocytogenes_mprF	2.54172e-16	1.30263e-14	1st-AB = 2nd-AB = pre-AB>>>other Subjects = post-AB
5	tetA(48)	3.30145e-15	1.35359e-13	1st-AB>>>other Subjects>>>pre-AB = 2nd-AB = post-AB
6	tet(L)	5.72664e-15	1.9566e-13	1st-AB>>>other Subjects>>>pre-AB = 2nd-AB = post-AB
7	efmA	3.66206e-14	1.07246e-12	1st-AB = pre-AB>>>other Subjects>>>2nd-AB = post-AB
8	acrD	5.70467e-10	1.46182e-08	2nd-AB>>>post-AB>> pre-AB = 1st-AB = other Subjects
9	mdsB	6.49807e-10	1.48011e-08	pre-AB = other Subjects > 1st-AB = 2nd-AB = post-AB
10	TEM.159	1.00681e-09	2.06397e-08	pre-AB>>>other Subjects = 1st-AB = 2nd-AB = post-AB
11	cdeA	6.59345e-09	1.07471e-07	pre-AB = 2nd-AB = post-AB>>>other Subjects > 1st-AB
12	cmeB	6.67578e-09	1.07471e-07	other Subjects = pre-AB = 1st-AB = 2nd-AB = post-AB
13	CblA.1	6.81523e-09	1.07471e-07	other Subjects = pre-AB = 1st-AB = 2nd-AB = post-AB
14	blaR1	1.28165e-08	1.76276e-07	pre-AB > post-AB>>>other Subjects > 1st-AB = 2nd-AB
15	LlmA_23S_ribosomal_RNA_methyltransferase	1.28982e-08	1.76276e-07	pre-AB = post-AB>>>other Subjects > 2nd-AB = 1st-AB
16	smeE	1.74045e-08	2.22995e-07	pre-AB = other Subjects > 1st-AB = 2nd-AB = post-AB
17	Streptococcus_agalactiae_mprF	1.88566e-08	2.27388e-07	1st-AB = pre-AB = 2nd-AB = post-AB>>>other Subjects
18	cfrA	4.45462e-08	5.07331e-07	post-AB>>>other Subjects = pre-AB = 1st-AB = 2nd-AB
19	patB	1.67227e-07	1.80429e-06	1st-AB = 2nd-AB = pre-AB = post-AB>>>other Subjects
20	tetX	3.33263e-07	3.41595e-06	pre-AB>= other Subjects>= 1st-AB = 2nd-AB = post-AB
21	mecC	5.97238e-07	5.83018e-06	post-AB = pre-AB = 1st-AB = other Subjects > 2nd-AB
22	salA	1.79178e-06	1.59583e-05	pre-AB = post-AB = 2nd-AB = other Subjects>= 1st-AB
23	efrB	1.84144e-06	1.59583e-05	1st-AB>= post-AB = pre-AB = 2nd-AB>> other Subjects
24	pmrA	1.86829e-06	1.59583e-05	1st-AB = 2nd-AB = post-AB = pre-AB = other Subjects
25	Mycobacterium_tuberculosis_intrinsic_murA_conferring_resistance_to_fosfomycin	2.04327e-06	1.67548e-05	pre-AB>= post-AB = 1st-AB = other Subjects = 2nd-AB
26	tet(G)	3.33809e-06	2.63196e-05	pre-AB>>>other Subjects = 1st-AB = 2nd-AB = post-AB
27	tetO	9.82307e-06	7.45826e-05	pre-AB = post-AB>> other Subjects > 2nd-AB = 1st-AB
28	catI	1.49624e-05	0.000109546	other Subjects = pre-AB = 1st-AB = 2nd-AB = post-AB
29	PmrE	1.60068e-05	0.000113151	2nd-AB > pre-AB = post-AB > other Subjects > 1st-AB
30	ErmF	2.94398e-05	0.000201172	pre-AB = other Subjects>= 1st-AB = 2nd-AB = post-AB
31	-1	3.57924e-05	0.000236692	1st-AB>= other Subjects>= post-AB>= pre-AB = 2nd-AB
32	oleR	3.69882e-05	0.000236955	pre-AB = other Subjects = 1st-AB = 2nd-AB = post-AB
33	Bifidobacteria_intrinsic_ileS_conferring_resistance_to_mupirocin	5.1951e-05	0.000322726	2nd-AB > other Subjects = pre-AB = post-AB > 1st-AB
34	mphB	6.05382e-05	0.00036501	other Subjects = pre-AB = 1st-AB = 2nd-AB = post-AB
35	ErmG	6.47953e-05	0.000379515	2nd-AB>> post-AB = pre-AB = other Subjects = 1st-AB
36	hmrM	0.000196319	0.00111792	other Subjects = pre-AB = 1st-AB = 2nd-AB = post-AB
37	dfrE	0.000279775	0.00155011	2nd-AB > other Subjects = pre-AB = post-AB = 1st-AB
38	dfrF	0.000314772	0.00168416	post-AB>> other Subjects>= pre-AB = 1st-AB = 2nd-AB
39	efrA	0.000327788	0.00168416	1st-AB = 2nd-AB = pre-AB = post-AB > other Subjects
40	vanU	0.000328617	0.00168416	pre-AB > post-AB > other Subjects>= 1st-AB = 2nd-AB
41	Streptomyces_cinnamoneus_EF.Tu_mutants_conferring_resistance_to_elfamycin	0.000410142	0.00205071	pre-AB>= post-AB = other Subjects > 2nd-AB = 1st-AB
42	TaeA	0.000455914	0.00222529	2nd-AB = 1st-AB = post-AB = other Subjects = pre-AB
43	ramA	0.000566177	0.00269922	2nd-AB = post-AB>>>other Subjects = pre-AB = 1st-AB
44	mefC	0.000591905	0.00275774	2nd-AB>> post-AB = other Subjects = pre-AB = 1st-AB
45	ANT(6).Ib	0.000981617	0.00447181	post-AB>> other Subjects = pre-AB = 1st-AB = 2nd-AB
46	CfxA2	0.00116185	0.0051217	2nd-AB>> post-AB = other Subjects = pre-AB = 1st-AB
47	marA	0.00117424	0.0051217	post-AB = pre-AB = other Subjects = 1st-AB = 2nd-AB
48	mecA	0.00123717	0.00528374	pre-AB>= 2nd-AB = post-AB = other Subjects = 1st-AB
49	mdtM	0.00133119	0.00556928	other Subjects = pre-AB = 1st-AB = 2nd-AB = post-AB
50	mfd	0.00136647	0.00560251	1st-AB = pre-AB = post-AB = other Subjects>> 2nd-AB
51	baeS	0.00153848	0.00613208	pre-AB>>>other Subjects = 1st-AB = 2nd-AB = post-AB
52	tetW	0.00155545	0.00613208	pre-AB > post-AB = other Subjects > 1st-AB = 2nd-AB
53	aad(6)	0.00172554	0.00667428	post-AB>> other Subjects = pre-AB = 1st-AB = 2nd-AB
54	ErmB	0.00207593	0.00788085	post-AB>= pre-AB = other Subjects>= 1st-AB = 2nd-AB
55	vanXYG	0.00295132	0.0110004	other Subjects = post-AB = pre-AB = 1st-AB = 2nd-AB
56	tetQ	0.00301972	0.0110543	2nd-AB > post-AB = other Subjects = pre-AB = 1st-AB
57	PmrF	0.00341186	0.0122707	pre-AB>> other Subjects = 1st-AB = 2nd-AB = post-AB
58	arlR	0.00369726	0.0126079	1st-AB = pre-AB = post-AB = 2nd-AB = other Subjects
59	patA	0.00372737	0.0126079	pre-AB = post-AB = other Subjects = 1st-AB = 2nd-AB
60	lnuC	0.00375288	0.0126079	other Subjects = pre-AB = 1st-AB = 2nd-AB = post-AB
61	SAT.4	0.0037591	0.0126079	post-AB>> other Subjects = pre-AB = 1st-AB = 2nd-AB
62	Escherichia_coli_acrA	0.00381314	0.0126079	pre-AB > other Subjects = 1st-AB = 2nd-AB = post-AB
63	ErmX	0.00410241	0.0133491	1st-AB>>>other Subjects = pre-AB = 2nd-AB = post-AB
64	qacH	0.00478694	0.0153332	other Subjects = pre-AB = 1st-AB = 2nd-AB = post-AB
65	APH(3).Ib	0.00498396	0.0157186	pre-AB>> other Subjects = 1st-AB = 2nd-AB = post-AB
66	aadA5	0.00509595	0.0158283	other Subjects = pre-AB = 1st-AB = 2nd-AB = post-AB
67	emrD	0.0057399	0.0175624	pre-AB = post-AB>= other Subjects = 1st-AB = 2nd-AB
68	APH(6).Id	0.00798082	0.0240598	pre-AB > other Subjects = 1st-AB = 2nd-AB = post-AB
69	baeR	0.0122465	0.0358721	pre-AB > other Subjects = 1st-AB = 2nd-AB = post-AB
70	emrR	0.0124811	0.0358721	pre-AB > other Subjects = 1st-AB = 2nd-AB = post-AB
71	mdtH	0.0124884	0.0358721	pre-AB > other Subjects = 1st-AB = 2nd-AB = post-AB
72	PmrC	0.012599	0.0358721	pre-AB>= other Subjects = 1st-AB = 2nd-AB = post-AB
73	kdpE	0.0130029	0.0365151	pre-AB = other Subjects = 1st-AB = 2nd-AB = post-AB
74	AAC(6).Ie.APH(2).Ia	0.0139486	0.0386415	post-AB > other Subjects = pre-AB = 1st-AB = 2nd-AB
75	MuxB	0.0144434	0.0392483	pre-AB = post-AB = other Subjects = 1st-AB = 2nd-AB
76	mdtA	0.0145506	0.0392483	pre-AB > other Subjects = 1st-AB = 2nd-AB = post-AB
77	bacA	0.0170552	0.0454068	pre-AB > other Subjects = 1st-AB = 2nd-AB = post-AB
78	arnA	0.0188655	0.0494448	pre-AB>= other Subjects = 1st-AB = 2nd-AB = post-AB
79	leuO	0.0190543	0.0494448	pre-AB>= other Subjects = 1st-AB = 2nd-AB = post-AB
80	cpxA	0.021807	0.0558804	pre-AB>= other Subjects = 1st-AB = 2nd-AB = post-AB
81	dfrA17	0.0238601	0.0603868	other Subjects = pre-AB = 1st-AB = 2nd-AB = post-AB
82	tet(A)	0.0243132	0.0607829	other Subjects = pre-AB = 1st-AB = 2nd-AB = post-AB
83	mdtO	0.0277283	0.0677806	pre-AB>= other Subjects = 1st-AB = 2nd-AB = post-AB
84	lsaB	0.0277735	0.0677806	pre-AB > other Subjects = 1st-AB = 2nd-AB = post-AB
85	vanRA	0.0300836	0.0725546	other Subjects = pre-AB = 1st-AB = 2nd-AB = post-AB
86	APH(4).Ia	0.0304934	0.0726878	post-AB = other Subjects = pre-AB = 1st-AB = 2nd-AB
87	tet32	0.0309921	0.0730274	pre-AB = post-AB = other Subjects = 2nd-AB = 1st-AB
88	vanD	0.0320095	0.0745677	other Subjects = pre-AB = 1st-AB = 2nd-AB = post-AB
89	CMY.47	0.0393632	0.0906681	pre-AB = other Subjects = 1st-AB = 2nd-AB = post-AB
90	cepA_beta.lactamase	0.0402708	0.0917279	post-AB = pre-AB = other Subjects = 1st-AB = 2nd-AB
91	lsaE	0.0443646	0.0999423	2nd-AB = post-AB = other Subjects = pre-AB = 1st-AB
92	tetM	0.0452319	0.100788	post-AB = pre-AB = 1st-AB = other Subjects = 2nd-AB
93	lnuD	0.0489051	0.107802	other Subjects = pre-AB = 1st-AB = 2nd-AB = post-AB
94	Escherichia_coli_emrE	0.051486	0.112283	pre-AB > other Subjects = 1st-AB = 2nd-AB = post-AB
95	msrB	0.0551339	0.113998	pre-AB = other Subjects = 1st-AB = 2nd-AB = post-AB
96	AcrE	0.0575703	0.113998	other Subjects>= pre-AB = 1st-AB = 2nd-AB = post-AB
97	CRP	0.058155	0.113998	pre-AB = other Subjects = 1st-AB = 2nd-AB = post-AB
98	CMY.101	0.0650621	0.113998	other Subjects = pre-AB = 1st-AB = 2nd-AB = post-AB
99	mefE	0.0650621	0.113998	other Subjects = pre-AB = 1st-AB = 2nd-AB = post-AB
100	mtrR	0.0650621	0.113998	other Subjects = pre-AB = 1st-AB = 2nd-AB = post-AB
101	farA	0.0650621	0.113998	other Subjects = pre-AB = 1st-AB = 2nd-AB = post-AB
102	catQ	0.0650621	0.113998	other Subjects = pre-AB = 1st-AB = 2nd-AB = post-AB
103	smeR	0.0650621	0.113998	other Subjects = pre-AB = 1st-AB = 2nd-AB = post-AB
104	vatF	0.0650621	0.113998	other Subjects = pre-AB = 1st-AB = 2nd-AB = post-AB
105	MexV	0.0650621	0.113998	other Subjects = pre-AB = 1st-AB = 2nd-AB = post-AB
106	QnrS5	0.0650621	0.113998	other Subjects = pre-AB = 1st-AB = 2nd-AB = post-AB
107	tetB(60)	0.0650621	0.113998	other Subjects = pre-AB = 1st-AB = 2nd-AB = post-AB
108	lrfA	0.0650621	0.113998	other Subjects = pre-AB = 1st-AB = 2nd-AB = post-AB
109	qepA	0.0650621	0.113998	other Subjects = pre-AB = 1st-AB = 2nd-AB = post-AB
110	mtrC	0.0650621	0.113998	other Subjects = pre-AB = 1st-AB = 2nd-AB = post-AB
111	Erm(31)	0.0650621	0.113998	other Subjects = pre-AB = 1st-AB = 2nd-AB = post-AB
112	tetB(P)	0.0650621	0.113998	other Subjects = pre-AB = 1st-AB = 2nd-AB = post-AB
113	sdiA	0.0650621	0.113998	other Subjects = pre-AB = 1st-AB = 2nd-AB = post-AB
114	tetS	0.0650621	0.113998	other Subjects = pre-AB = 1st-AB = 2nd-AB = post-AB
115	tetA(P)	0.0650621	0.113998	other Subjects = pre-AB = 1st-AB = 2nd-AB = post-AB
116	emrA	0.0650621	0.113998	other Subjects = pre-AB = 1st-AB = 2nd-AB = post-AB
117	mdtG	0.0650621	0.113998	other Subjects = pre-AB = 1st-AB = 2nd-AB = post-AB
118	vanG	0.0830054	0.144204	pre-AB = post-AB = other Subjects = 1st-AB = 2nd-AB
119	gadX	0.0982582	0.169268	pre-AB = other Subjects = 1st-AB = 2nd-AB = post-AB
120	sul1	0.106641	0.182179	other Subjects = pre-AB = 1st-AB = 2nd-AB = post-AB
121	BahA	0.118787	0.201251	other Subjects = pre-AB = 1st-AB = 2nd-AB = post-AB
122	APH(3).IIIa	0.12667	0.212847	post-AB = other Subjects = pre-AB = 1st-AB = 2nd-AB
123	oqxB	0.130567	0.216231	post-AB = other Subjects = pre-AB = 1st-AB = 2nd-AB
124	gadE	0.130794	0.216231	pre-AB = other Subjects = 1st-AB = 2nd-AB = post-AB
125	vanSD	0.13381	0.219449	other Subjects = pre-AB = 1st-AB = 2nd-AB = post-AB
126	farB	0.136264	0.221608	other Subjects = pre-AB = 1st-AB = 2nd-AB = post-AB
127	Streptomyces_rishiriensis_parY_mutant_conferring_resistance_to_aminocoumarin	0.137289	0.221608	1st-AB = post-AB = other Subjects = pre-AB = 2nd-AB
128	desR	0.141132	0.225062	other Subjects = pre-AB = 2nd-AB = post-AB = 1st-AB
129	emrK	0.141737	0.225062	pre-AB = other Subjects = 1st-AB = 2nd-AB = post-AB
130	AcrS	0.142723	0.225062	pre-AB = other Subjects = 1st-AB = 2nd-AB = post-AB
131	vgaC	0.145818	0.226691	other Subjects = pre-AB = 1st-AB = 2nd-AB = post-AB
132	robA	0.145967	0.226691	pre-AB = other Subjects = 1st-AB = 2nd-AB = post-AB
133	vanRG	0.149523	0.230467	other Subjects = post-AB = pre-AB = 1st-AB = 2nd-AB
134	ceoB	0.154549	0.236436	other Subjects = pre-AB = 1st-AB = 2nd-AB = post-AB
135	MdtK	0.158686	0.240967	pre-AB = other Subjects = 1st-AB = 2nd-AB = post-AB
136	vanTG	0.176203	0.265601	pre-AB = other Subjects = 1st-AB = 2nd-AB = post-AB
137	cat	0.202847	0.303404	pre-AB = post-AB = other Subjects = 1st-AB = 2nd-AB
138	vanWG	0.204243	0.303404	other Subjects = pre-AB = 1st-AB = 2nd-AB = post-AB
139	sul2	0.225155	0.332063	other Subjects = pre-AB = 1st-AB = 2nd-AB = post-AB
140	Chlamydia_trachomatis_intrinsic_murA_conferring_resistance_to_fosfomycin	0.259668	0.380229	post-AB = 1st-AB = other Subjects = pre-AB = 2nd-AB
141	YojI	0.272617	0.396357	pre-AB = other Subjects = 1st-AB = 2nd-AB = post-AB
142	tet44	0.285428	0.412062	other Subjects = pre-AB = 1st-AB = 2nd-AB = post-AB
143	vanRD	0.299308	0.429079	other Subjects = pre-AB = 1st-AB = 2nd-AB = post-AB
144	Erm(42)	0.327357	0.466029	other Subjects = pre-AB = 1st-AB = 2nd-AB = post-AB
145	tet37	0.331277	0.468357	other Subjects = pre-AB = 1st-AB = 2nd-AB = post-AB
146	gadW	0.362516	0.509012	pre-AB = other Subjects = 1st-AB = 2nd-AB = post-AB
147	SAT.1	0.366762	0.51147	other Subjects = pre-AB = 1st-AB = 2nd-AB = post-AB
148	vanXD	0.378177	0.523827	other Subjects = pre-AB = 1st-AB = 2nd-AB = post-AB
149	PmpM	0.436228	0.600179	other Subjects = pre-AB = 1st-AB = 2nd-AB = post-AB
150	tetA(60)	0.457724	0.625556	other Subjects = pre-AB = 1st-AB = 2nd-AB = post-AB
151	tet(D)	0.509128	0.691201	other Subjects = pre-AB = 1st-AB = 2nd-AB = post-AB
152	OXA.347	0.554129	0.747345	other Subjects = pre-AB = 1st-AB = 2nd-AB = post-AB
153	catP	0.574376	0.769589	other Subjects = pre-AB = 1st-AB = 2nd-AB = post-AB
154	vanSG	0.580069	0.772169	other Subjects = pre-AB = 1st-AB = 2nd-AB = post-AB
155	vatB	0.763227	0.993834	other Subjects = pre-AB = 1st-AB = 2nd-AB = post-AB
156	CfxA6	0.7915	0.993834	other Subjects = pre-AB = 1st-AB = 2nd-AB = post-AB
157	EreB	0.791855	0.993834	other Subjects = pre-AB = 1st-AB = 2nd-AB = post-AB
158	clbA	0.791855	0.993834	other Subjects = pre-AB = 1st-AB = 2nd-AB = post-AB
159	cmeA	0.824395	0.993834	other Subjects = pre-AB = 1st-AB = 2nd-AB = post-AB
160	RlmA(II)	0.90942	0.993834	other Subjects = pre-AB = 1st-AB = 2nd-AB = post-AB
161	TriC	0.918001	0.993834	other Subjects = pre-AB = 1st-AB = 2nd-AB = post-AB
162	MexC	0.918001	0.993834	other Subjects = pre-AB = 1st-AB = 2nd-AB = post-AB
163	APH(2).IIa	0.924351	0.993834	other Subjects = pre-AB = 1st-AB = 2nd-AB = post-AB
164	AAC(6).Ip	0.93703	0.993834	other Subjects = pre-AB = 1st-AB = 2nd-AB = post-AB
165	APH(2).Ig	0.93811	0.993834	other Subjects = pre-AB = 1st-AB = 2nd-AB = post-AB
166	aadA	0.944625	0.993834	other Subjects = pre-AB = 1st-AB = 2nd-AB = post-AB
167	dfrA14	0.944625	0.993834	other Subjects = pre-AB = 1st-AB = 2nd-AB = post-AB
168	CcrA_beta.lactamase	0.950925	0.993834	other Subjects = pre-AB = 1st-AB = 2nd-AB = post-AB
169	smeD	0.950925	0.993834	other Subjects = pre-AB = 1st-AB = 2nd-AB = post-AB
170	APH(3).Ia	0.950925	0.993834	other Subjects = pre-AB = 1st-AB = 2nd-AB = post-AB
171	APH(2).IVa	0.976802	0.993834	other Subjects = pre-AB = 1st-AB = 2nd-AB = post-AB
172	MdfA	0.976802	0.993834	other Subjects = pre-AB = 1st-AB = 2nd-AB = post-AB
173	rmtD	0.976802	0.993834	other Subjects = pre-AB = 1st-AB = 2nd-AB = post-AB
174	CTX.M.15	0.976802	0.993834	other Subjects = pre-AB = 1st-AB = 2nd-AB = post-AB
175	vanHB	0.993834	0.993834	other Subjects = pre-AB = 1st-AB = 2nd-AB = post-AB
176	MexK	0.993834	0.993834	other Subjects = pre-AB = 1st-AB = 2nd-AB = post-AB
177	catB10	0.993834	0.993834	other Subjects = pre-AB = 1st-AB = 2nd-AB = post-AB
178	emrY	0.993834	0.993834	other Subjects = pre-AB = 1st-AB = 2nd-AB = post-AB
179	dfrA12	0.993834	0.993834	other Subjects = pre-AB = 1st-AB = 2nd-AB = post-AB
180	vanSB	0.993834	0.993834	other Subjects = pre-AB = 1st-AB = 2nd-AB = post-AB
181	vanYB	0.993834	0.993834	other Subjects = pre-AB = 1st-AB = 2nd-AB = post-AB
182	APH(2).IIIa	0.993834	0.993834	other Subjects = pre-AB = 1st-AB = 2nd-AB = post-AB
183	ANT(3).IIb	0.993834	0.993834	other Subjects = pre-AB = 1st-AB = 2nd-AB = post-AB
184	TEM.220	0.993834	0.993834	other Subjects = pre-AB = 1st-AB = 2nd-AB = post-AB
185	MuxC	0.993834	0.993834	other Subjects = pre-AB = 1st-AB = 2nd-AB = post-AB
186	vanB	0.993834	0.993834	other Subjects = pre-AB = 1st-AB = 2nd-AB = post-AB
187	ACC.1	0.993834	0.993834	other Subjects = pre-AB = 1st-AB = 2nd-AB = post-AB
188	mphA	0.993834	0.993834	other Subjects = pre-AB = 1st-AB = 2nd-AB = post-AB
189	NmcR	0.993834	0.993834	other Subjects = pre-AB = 1st-AB = 2nd-AB = post-AB
190	OprA	0.993834	0.993834	other Subjects = pre-AB = 1st-AB = 2nd-AB = post-AB
191	Mrx	0.993834	0.993834	other Subjects = pre-AB = 1st-AB = 2nd-AB = post-AB
192	vanRI	0.993834	0.993834	other Subjects = pre-AB = 1st-AB = 2nd-AB = post-AB
193	vanYG1	0.993834	0.993834	other Subjects = pre-AB = 1st-AB = 2nd-AB = post-AB
194	vanI	0.993834	0.993834	other Subjects = pre-AB = 1st-AB = 2nd-AB = post-AB
195	OXA.85	0.993834	0.993834	other Subjects = pre-AB = 1st-AB = 2nd-AB = post-AB
196	vanRB	0.993834	0.993834	other Subjects = pre-AB = 1st-AB = 2nd-AB = post-AB
197	aadA2	0.993834	0.993834	other Subjects = pre-AB = 1st-AB = 2nd-AB = post-AB
198	AAC(3).IIa	0.993834	0.993834	other Subjects = pre-AB = 1st-AB = 2nd-AB = post-AB
199	rmtG	0.993834	0.993834	other Subjects = pre-AB = 1st-AB = 2nd-AB = post-AB
200	vanHD	0.993834	0.993834	other Subjects = pre-AB = 1st-AB = 2nd-AB = post-AB
201	lnuB	0.993834	0.993834	other Subjects = pre-AB = 1st-AB = 2nd-AB = post-AB
202	tet34	0.993834	0.993834	other Subjects = pre-AB = 1st-AB = 2nd-AB = post-AB
203	vanXM	0.993834	0.993834	other Subjects = pre-AB = 1st-AB = 2nd-AB = post-AB
204	H.NS	0.993834	0.993834	other Subjects = pre-AB = 1st-AB = 2nd-AB = post-AB
205	AAC(6).Ib.cr	0.993834	0.993834	other Subjects = pre-AB = 1st-AB = 2nd-AB = post-AB

## Sheet: ARC
Rank	Feature name	p-value	q-value	Direction
1	FUSIDIC ACID	1.22692e-08	3.04503e-06	other Subjects = pre-AB = 1st-AB = 2nd-AB = post-AB
2	CEFOTAXIME	3.98691e-08	3.04503e-06	other Subjects = pre-AB > post-AB = 1st-AB = 2nd-AB
3	KANAMYCIN A	2.43494e-07	3.04503e-06	2nd-AB = post-AB>>>other Subjects = pre-AB = 1st-AB
4	AMIKACIN	3.28084e-07	3.04503e-06	2nd-AB>= post-AB>>>other Subjects = pre-AB = 1st-AB
5	AMINOGLYCOSIDE ANTIBIOTIC	3.28084e-07	3.04503e-06	2nd-AB>= post-AB>>>other Subjects = pre-AB = 1st-AB
6	APRAMYCIN	3.28084e-07	3.04503e-06	2nd-AB>= post-AB>>>other Subjects = pre-AB = 1st-AB
7	ARBEKACIN	3.28084e-07	3.04503e-06	2nd-AB>= post-AB>>>other Subjects = pre-AB = 1st-AB
8	ASTROMICIN	3.28084e-07	3.04503e-06	2nd-AB>= post-AB>>>other Subjects = pre-AB = 1st-AB
9	BUTIROSIN	3.28084e-07	3.04503e-06	2nd-AB>= post-AB>>>other Subjects = pre-AB = 1st-AB
10	CAPREOMYCIN	3.28084e-07	3.04503e-06	2nd-AB>= post-AB>>>other Subjects = pre-AB = 1st-AB
11	DIBEKACIN	3.28084e-07	3.04503e-06	2nd-AB>= post-AB>>>other Subjects = pre-AB = 1st-AB
12	G418	3.28084e-07	3.04503e-06	2nd-AB>= post-AB>>>other Subjects = pre-AB = 1st-AB
13	GENTAMICIN A	3.28084e-07	3.04503e-06	2nd-AB>= post-AB>>>other Subjects = pre-AB = 1st-AB
14	GENTAMICIN B	3.28084e-07	3.04503e-06	2nd-AB>= post-AB>>>other Subjects = pre-AB = 1st-AB
15	GENTAMICIN C	3.28084e-07	3.04503e-06	2nd-AB>= post-AB>>>other Subjects = pre-AB = 1st-AB
16	HYGROMYCIN B	3.28084e-07	3.04503e-06	2nd-AB>= post-AB>>>other Subjects = pre-AB = 1st-AB
17	ISEPAMICIN	3.28084e-07	3.04503e-06	2nd-AB>= post-AB>>>other Subjects = pre-AB = 1st-AB
18	KASUGAMYCIN	3.28084e-07	3.04503e-06	2nd-AB>= post-AB>>>other Subjects = pre-AB = 1st-AB
19	LIVIDOMYCIN	3.28084e-07	3.04503e-06	2nd-AB>= post-AB>>>other Subjects = pre-AB = 1st-AB
20	LIVIDOMYCIN A	3.28084e-07	3.04503e-06	2nd-AB>= post-AB>>>other Subjects = pre-AB = 1st-AB
21	LIVIDOMYCIN B	3.28084e-07	3.04503e-06	2nd-AB>= post-AB>>>other Subjects = pre-AB = 1st-AB
22	NEOMYCIN	3.28084e-07	3.04503e-06	2nd-AB>= post-AB>>>other Subjects = pre-AB = 1st-AB
23	NETILMICIN	3.28084e-07	3.04503e-06	2nd-AB>= post-AB>>>other Subjects = pre-AB = 1st-AB
24	PAROMOMYCIN	3.28084e-07	3.04503e-06	2nd-AB>= post-AB>>>other Subjects = pre-AB = 1st-AB
25	PLAZOMICIN	3.28084e-07	3.04503e-06	2nd-AB>= post-AB>>>other Subjects = pre-AB = 1st-AB
26	RIBOSTAMYCIN	3.28084e-07	3.04503e-06	2nd-AB>= post-AB>>>other Subjects = pre-AB = 1st-AB
27	SISOMICIN	3.28084e-07	3.04503e-06	2nd-AB>= post-AB>>>other Subjects = pre-AB = 1st-AB
28	SPECTINOMYCIN	3.28084e-07	3.04503e-06	2nd-AB>= post-AB>>>other Subjects = pre-AB = 1st-AB
29	STREPTOMYCIN	3.28084e-07	3.04503e-06	2nd-AB>= post-AB>>>other Subjects = pre-AB = 1st-AB
30	TOBRAMYCIN	3.28084e-07	3.04503e-06	2nd-AB>= post-AB>>>other Subjects = pre-AB = 1st-AB
31	VERDAMICIN	3.28084e-07	3.04503e-06	2nd-AB>= post-AB>>>other Subjects = pre-AB = 1st-AB
32	VERTILIMICIN	3.28084e-07	3.04503e-06	2nd-AB>= post-AB>>>other Subjects = pre-AB = 1st-AB
33	CELESTICETIN	5.45674e-07	4.63043e-06	pre-AB = post-AB>>>other Subjects = 1st-AB = 2nd-AB
34	LINCOMYCIN	5.45674e-07	4.63043e-06	pre-AB = post-AB>>>other Subjects = 1st-AB = 2nd-AB
35	LINCOSAMIDE ANTIBIOTIC	5.45674e-07	4.63043e-06	pre-AB = post-AB>>>other Subjects = 1st-AB = 2nd-AB
36	CLINDAMYCIN	7.70659e-07	6.35793e-06	pre-AB = post-AB>>>other Subjects = 1st-AB = 2nd-AB
37	FOSFOMYCIN	3.75376e-06	2.66822e-05	pre-AB>= post-AB = 1st-AB = other Subjects = 2nd-AB
38	AMOXICILLIN	5.21067e-06	2.66822e-05	pre-AB = post-AB = 1st-AB = other Subjects = 2nd-AB
39	AMPICILLIN	5.21067e-06	2.66822e-05	pre-AB = post-AB = 1st-AB = other Subjects = 2nd-AB
40	AZLOCILLIN	5.21067e-06	2.66822e-05	pre-AB = post-AB = 1st-AB = other Subjects = 2nd-AB
41	BENZYLPENICILLIN	5.21067e-06	2.66822e-05	pre-AB = post-AB = 1st-AB = other Subjects = 2nd-AB
42	CARBENICILLIN	5.21067e-06	2.66822e-05	pre-AB = post-AB = 1st-AB = other Subjects = 2nd-AB
43	CLOXACILLIN	5.21067e-06	2.66822e-05	pre-AB = post-AB = 1st-AB = other Subjects = 2nd-AB
44	DICLOXACILLIN	5.21067e-06	2.66822e-05	pre-AB = post-AB = 1st-AB = other Subjects = 2nd-AB
45	FLUCLOXACILLIN	5.21067e-06	2.66822e-05	pre-AB = post-AB = 1st-AB = other Subjects = 2nd-AB
46	ISOPENICILLIN N	5.21067e-06	2.66822e-05	pre-AB = post-AB = 1st-AB = other Subjects = 2nd-AB
47	MECILLINAM	5.21067e-06	2.66822e-05	pre-AB = post-AB = 1st-AB = other Subjects = 2nd-AB
48	METHICILLIN	5.21067e-06	2.66822e-05	pre-AB = post-AB = 1st-AB = other Subjects = 2nd-AB
49	MEZLOCILLIN	5.21067e-06	2.66822e-05	pre-AB = post-AB = 1st-AB = other Subjects = 2nd-AB
50	NAFCILLIN	5.21067e-06	2.66822e-05	pre-AB = post-AB = 1st-AB = other Subjects = 2nd-AB
51	OXACILLIN	5.21067e-06	2.66822e-05	pre-AB = post-AB = 1st-AB = other Subjects = 2nd-AB
52	PENAM	5.21067e-06	2.66822e-05	pre-AB = post-AB = 1st-AB = other Subjects = 2nd-AB
53	PENICILLIN	5.21067e-06	2.66822e-05	pre-AB = post-AB = 1st-AB = other Subjects = 2nd-AB
54	PENICILLIN N	5.21067e-06	2.66822e-05	pre-AB = post-AB = 1st-AB = other Subjects = 2nd-AB
55	PHENOXYMETHYLPENICILLIN	5.21067e-06	2.66822e-05	pre-AB = post-AB = 1st-AB = other Subjects = 2nd-AB
56	PIPERACILLIN	5.21067e-06	2.66822e-05	pre-AB = post-AB = 1st-AB = other Subjects = 2nd-AB
57	PROPICILLIN	5.21067e-06	2.66822e-05	pre-AB = post-AB = 1st-AB = other Subjects = 2nd-AB
58	TEMOCILLIN	5.21067e-06	2.66822e-05	pre-AB = post-AB = 1st-AB = other Subjects = 2nd-AB
59	ACRIFLAVIN	6.35651e-06	3.1998e-05	other Subjects = pre-AB = 1st-AB = 2nd-AB = post-AB
60	COLISTIN	1.48984e-05	6.50709e-05	2nd-AB > pre-AB = post-AB > other Subjects > 1st-AB
61	COLISTIN A	1.48984e-05	6.50709e-05	2nd-AB > pre-AB = post-AB > other Subjects > 1st-AB
62	COLISTIN B	1.48984e-05	6.50709e-05	2nd-AB > pre-AB = post-AB > other Subjects > 1st-AB
63	POLYMYXIN ANTIBIOTIC	1.48984e-05	6.50709e-05	2nd-AB > pre-AB = post-AB > other Subjects > 1st-AB
64	POLYMYXIN B	1.48984e-05	6.50709e-05	2nd-AB > pre-AB = post-AB > other Subjects > 1st-AB
65	POLYMYXIN B1	1.48984e-05	6.50709e-05	2nd-AB > pre-AB = post-AB > other Subjects > 1st-AB
66	POLYMYXIN B2	1.48984e-05	6.50709e-05	2nd-AB > pre-AB = post-AB > other Subjects > 1st-AB
67	POLYMYXIN B3	1.48984e-05	6.50709e-05	2nd-AB > pre-AB = post-AB > other Subjects > 1st-AB
68	POLYMYXIN B4	1.48984e-05	6.50709e-05	2nd-AB > pre-AB = post-AB > other Subjects > 1st-AB
69	-1	3.57924e-05	0.000151591	1st-AB>= other Subjects>= post-AB>= pre-AB = 2nd-AB
70	LINEZOLID	3.90812e-05	0.000151591	post-AB>>>other Subjects = pre-AB = 1st-AB = 2nd-AB
71	TIAMULIN	3.90812e-05	0.000151591	post-AB>>>other Subjects = pre-AB = 1st-AB = 2nd-AB
72	GRISEOVIRIDIN	4.33847e-05	0.000151591	2nd-AB>> post-AB = pre-AB = other Subjects > 1st-AB
73	MADUMYCIN II	4.33847e-05	0.000151591	2nd-AB>> post-AB = pre-AB = other Subjects > 1st-AB
74	OSTREOGRYCIN B3	4.33847e-05	0.000151591	2nd-AB>> post-AB = pre-AB = other Subjects > 1st-AB
75	PATRICIN A	4.33847e-05	0.000151591	2nd-AB>> post-AB = pre-AB = other Subjects > 1st-AB
76	PATRICIN B	4.33847e-05	0.000151591	2nd-AB>> post-AB = pre-AB = other Subjects > 1st-AB
77	PRISTINAMYCIN IA	4.33847e-05	0.000151591	2nd-AB>> post-AB = pre-AB = other Subjects > 1st-AB
78	PRISTINAMYCIN IB	4.33847e-05	0.000151591	2nd-AB>> post-AB = pre-AB = other Subjects > 1st-AB
79	PRISTINAMYCIN IIA	4.33847e-05	0.000151591	2nd-AB>> post-AB = pre-AB = other Subjects > 1st-AB
80	STREPTOGRAMIN A ANTIBIOTIC	4.33847e-05	0.000151591	2nd-AB>> post-AB = pre-AB = other Subjects > 1st-AB
81	STREPTOGRAMIN ANTIBIOTIC	4.33847e-05	0.000151591	2nd-AB>> post-AB = pre-AB = other Subjects > 1st-AB
82	STREPTOGRAMIN B ANTIBIOTIC	4.33847e-05	0.000151591	2nd-AB>> post-AB = pre-AB = other Subjects > 1st-AB
83	VERNAMYCIN B-GAMMA	4.33847e-05	0.000151591	2nd-AB>> post-AB = pre-AB = other Subjects > 1st-AB
84	VERNAMYCIN C	4.33847e-05	0.000151591	2nd-AB>> post-AB = pre-AB = other Subjects > 1st-AB
85	VIRGINIAMYCIN S2	4.33847e-05	0.000151591	2nd-AB>> post-AB = pre-AB = other Subjects > 1st-AB
86	MUPIROCIN	5.1951e-05	0.000179412	2nd-AB > other Subjects = pre-AB = post-AB > 1st-AB
87	BRODIMOPRIM	0.000281405	0.000918432	2nd-AB > other Subjects > post-AB = pre-AB = 1st-AB
88	DIAMINOPYRIMIDINE ANTIBIOTIC	0.000281405	0.000918432	2nd-AB > other Subjects > post-AB = pre-AB = 1st-AB
89	ICLAPRIM	0.000281405	0.000918432	2nd-AB > other Subjects > post-AB = pre-AB = 1st-AB
90	TETROXOPRIM	0.000281405	0.000918432	2nd-AB > other Subjects > post-AB = pre-AB = 1st-AB
91	TRIMETHOPRIM	0.000281405	0.000918432	2nd-AB > other Subjects > post-AB = pre-AB = 1st-AB
92	DALFOPRISTIN	0.000353094	0.000974498	2nd-AB>> post-AB = pre-AB = 1st-AB = other Subjects
93	QUINUPRISTIN	0.000353094	0.000974498	2nd-AB>> post-AB = pre-AB = 1st-AB = other Subjects
94	AMYTHIAMICIN A	0.000410142	0.000974498	pre-AB>= post-AB = other Subjects > 2nd-AB = 1st-AB
95	AURODOX	0.000410142	0.000974498	pre-AB>= post-AB = other Subjects > 2nd-AB = 1st-AB
96	AZDIMYCIN	0.000410142	0.000974498	pre-AB>= post-AB = other Subjects > 2nd-AB = 1st-AB
97	CYCLIC THIAZOLYL PEPTIDE ELFAMYCIN	0.000410142	0.000974498	pre-AB>= post-AB = other Subjects > 2nd-AB = 1st-AB
98	DIHYDROMOCIMYCIN	0.000410142	0.000974498	pre-AB>= post-AB = other Subjects > 2nd-AB = 1st-AB
99	EFROTOMYCIN	0.000410142	0.000974498	pre-AB>= post-AB = other Subjects > 2nd-AB = 1st-AB
100	ELFAMYCIN ANTIBIOTIC	0.000410142	0.000974498	pre-AB>= post-AB = other Subjects > 2nd-AB = 1st-AB
101	ENACYLOXIN IIA	0.000410142	0.000974498	pre-AB>= post-AB = other Subjects > 2nd-AB = 1st-AB
102	FACTUMYCIN	0.000410142	0.000974498	pre-AB>= post-AB = other Subjects > 2nd-AB = 1st-AB
103	GANEFROMYCIN	0.000410142	0.000974498	pre-AB>= post-AB = other Subjects > 2nd-AB = 1st-AB
104	GE2270A	0.000410142	0.000974498	pre-AB>= post-AB = other Subjects > 2nd-AB = 1st-AB
105	GE37468	0.000410142	0.000974498	pre-AB>= post-AB = other Subjects > 2nd-AB = 1st-AB
106	HENEICOMYCIN	0.000410142	0.000974498	pre-AB>= post-AB = other Subjects > 2nd-AB = 1st-AB
107	KIRROMYCIN	0.000410142	0.000974498	pre-AB>= post-AB = other Subjects > 2nd-AB = 1st-AB
108	KIRROMYCIN-LIKE ANTIBIOTICS	0.000410142	0.000974498	pre-AB>= post-AB = other Subjects > 2nd-AB = 1st-AB
109	KIRROTHRICIN	0.000410142	0.000974498	pre-AB>= post-AB = other Subjects > 2nd-AB = 1st-AB
110	L-681	0.000410142	0.000974498	pre-AB>= post-AB = other Subjects > 2nd-AB = 1st-AB
111	217	0.000410142	0.000974498	pre-AB>= post-AB = other Subjects > 2nd-AB = 1st-AB
112	LFF571	0.000410142	0.000974498	pre-AB>= post-AB = other Subjects > 2nd-AB = 1st-AB
113	PHENELFAMYCIN A	0.000410142	0.000974498	pre-AB>= post-AB = other Subjects > 2nd-AB = 1st-AB
114	PHENELFAMYCIN B	0.000410142	0.000974498	pre-AB>= post-AB = other Subjects > 2nd-AB = 1st-AB
115	PHENELFAMYCIN C	0.000410142	0.000974498	pre-AB>= post-AB = other Subjects > 2nd-AB = 1st-AB
116	PHENELFAMYCIN D	0.000410142	0.000974498	pre-AB>= post-AB = other Subjects > 2nd-AB = 1st-AB
117	PHENELFAMYCIN E	0.000410142	0.000974498	pre-AB>= post-AB = other Subjects > 2nd-AB = 1st-AB
118	PHENELFAMYCIN F	0.000410142	0.000974498	pre-AB>= post-AB = other Subjects > 2nd-AB = 1st-AB
119	PHENELFAMYCIN G	0.000410142	0.000974498	pre-AB>= post-AB = other Subjects > 2nd-AB = 1st-AB
120	PHENELFAMYCIN H	0.000410142	0.000974498	pre-AB>= post-AB = other Subjects > 2nd-AB = 1st-AB
121	PULVOMYCIN	0.000410142	0.000974498	pre-AB>= post-AB = other Subjects > 2nd-AB = 1st-AB
122	SB22484	0.000410142	0.000974498	pre-AB>= post-AB = other Subjects > 2nd-AB = 1st-AB
123	UK-69	0.000410142	0.000974498	pre-AB>= post-AB = other Subjects > 2nd-AB = 1st-AB
124	753	0.000410142	0.000974498	pre-AB>= post-AB = other Subjects > 2nd-AB = 1st-AB
125	UNPHENELFAMYCIN	0.000410142	0.000974498	pre-AB>= post-AB = other Subjects > 2nd-AB = 1st-AB
126	PLEUROMUTILIN	0.000522319	0.00123118	2nd-AB>> post-AB = 1st-AB = other Subjects = pre-AB
127	NORFLOXACIN	0.000708259	0.00165632	1st-AB = pre-AB = post-AB = other Subjects>> 2nd-AB
128	ALL	0.000724298	0.0016806	2nd-AB = pre-AB > post-AB = other Subjects = 1st-AB
129	CIPROFLOXACIN	0.000732399	0.00168622	1st-AB = pre-AB = post-AB = other Subjects>> 2nd-AB
130	?	0.00111656	0.00208019	1st-AB = pre-AB = 2nd-AB = post-AB>= other Subjects
131	CINOXACIN	0.00111797	0.00208019	1st-AB = pre-AB = post-AB = other Subjects>> 2nd-AB
132	CLINAFLOXACIN	0.00111797	0.00208019	1st-AB = pre-AB = post-AB = other Subjects>> 2nd-AB
133	CLOFAZIMINE	0.00111797	0.00208019	1st-AB = pre-AB = post-AB = other Subjects>> 2nd-AB
134	ENOXACIN	0.00111797	0.00208019	1st-AB = pre-AB = post-AB = other Subjects>> 2nd-AB
135	FLEROXACIN	0.00111797	0.00208019	1st-AB = pre-AB = post-AB = other Subjects>> 2nd-AB
136	FLUOROQUINOLONE ANTIBIOTIC	0.00111797	0.00208019	1st-AB = pre-AB = post-AB = other Subjects>> 2nd-AB
137	GATIFLOXACIN	0.00111797	0.00208019	1st-AB = pre-AB = post-AB = other Subjects>> 2nd-AB
138	GREPAFLOXACIN	0.00111797	0.00208019	1st-AB = pre-AB = post-AB = other Subjects>> 2nd-AB
139	LEVOFLOXACIN	0.00111797	0.00208019	1st-AB = pre-AB = post-AB = other Subjects>> 2nd-AB
140	LOMEFLOXACIN	0.00111797	0.00208019	1st-AB = pre-AB = post-AB = other Subjects>> 2nd-AB
141	MOXIFLOXACIN	0.00111797	0.00208019	1st-AB = pre-AB = post-AB = other Subjects>> 2nd-AB
142	NALIDIXIC ACID	0.00111797	0.00208019	1st-AB = pre-AB = post-AB = other Subjects>> 2nd-AB
143	OFLOXACIN	0.00111797	0.00208019	1st-AB = pre-AB = post-AB = other Subjects>> 2nd-AB
144	PEFLOXACIN	0.00111797	0.00208019	1st-AB = pre-AB = post-AB = other Subjects>> 2nd-AB
145	SITAFLOXACIN	0.00111797	0.00208019	1st-AB = pre-AB = post-AB = other Subjects>> 2nd-AB
146	SPARFLOXACIN	0.00111797	0.00208019	1st-AB = pre-AB = post-AB = other Subjects>> 2nd-AB
147	TROVAFLOXACIN	0.00111797	0.00208019	1st-AB = pre-AB = post-AB = other Subjects>> 2nd-AB
148	ACTINOMYCIN	0.00130975	0.00208019	1st-AB = pre-AB = 2nd-AB = post-AB = other Subjects
149	ACTINOMYCIN D	0.00130975	0.00208019	1st-AB = pre-AB = 2nd-AB = post-AB = other Subjects
150	ARYLOMYCIN	0.00130975	0.00208019	1st-AB = pre-AB = 2nd-AB = post-AB = other Subjects
151	BACITRACIN	0.00130975	0.00208019	1st-AB = pre-AB = 2nd-AB = post-AB = other Subjects
152	BACITRACIN A	0.00130975	0.00208019	1st-AB = pre-AB = 2nd-AB = post-AB = other Subjects
153	BACITRACIN B	0.00130975	0.00208019	1st-AB = pre-AB = 2nd-AB = post-AB = other Subjects
154	BACITRACIN F	0.00130975	0.00208019	1st-AB = pre-AB = 2nd-AB = post-AB = other Subjects
155	BATTACIN	0.00130975	0.00208019	1st-AB = pre-AB = 2nd-AB = post-AB = other Subjects
156	DAPTOMYCIN	0.00130975	0.00208019	1st-AB = pre-AB = 2nd-AB = post-AB = other Subjects
157	DEFENSIN	0.00130975	0.00208019	1st-AB = pre-AB = 2nd-AB = post-AB = other Subjects
158	EDEINE	0.00130975	0.00208019	1st-AB = pre-AB = 2nd-AB = post-AB = other Subjects
159	EDEINE A	0.00130975	0.00208019	1st-AB = pre-AB = 2nd-AB = post-AB = other Subjects
160	EDEINE B	0.00130975	0.00208019	1st-AB = pre-AB = 2nd-AB = post-AB = other Subjects
161	EDEINE D	0.00130975	0.00208019	1st-AB = pre-AB = 2nd-AB = post-AB = other Subjects
162	EDEINE F	0.00130975	0.00208019	1st-AB = pre-AB = 2nd-AB = post-AB = other Subjects
163	FORMICIN	0.00130975	0.00208019	1st-AB = pre-AB = 2nd-AB = post-AB = other Subjects
164	GRAMICIDIN	0.00130975	0.00208019	1st-AB = pre-AB = 2nd-AB = post-AB = other Subjects
165	GRAMICIDIN A	0.00130975	0.00208019	1st-AB = pre-AB = 2nd-AB = post-AB = other Subjects
166	GRAMICIDIN B	0.00130975	0.00208019	1st-AB = pre-AB = 2nd-AB = post-AB = other Subjects
167	GRAMICIDIN C	0.00130975	0.00208019	1st-AB = pre-AB = 2nd-AB = post-AB = other Subjects
168	GRAMICIDIN S	0.00130975	0.00208019	1st-AB = pre-AB = 2nd-AB = post-AB = other Subjects
169	LIPOPEPTIDE ANTIBIOTIC	0.00130975	0.00208019	1st-AB = pre-AB = 2nd-AB = post-AB = other Subjects
170	LUGDUNIN	0.00130975	0.00208019	1st-AB = pre-AB = 2nd-AB = post-AB = other Subjects
171	LYSOCIN	0.00130975	0.00208019	1st-AB = pre-AB = 2nd-AB = post-AB = other Subjects
172	LYSOCIN E	0.00130975	0.00208019	1st-AB = pre-AB = 2nd-AB = post-AB = other Subjects
173	MAGAININ	0.00130975	0.00208019	1st-AB = pre-AB = 2nd-AB = post-AB = other Subjects
174	MAGAININ 1	0.00130975	0.00208019	1st-AB = pre-AB = 2nd-AB = post-AB = other Subjects
175	MAGAININ 2	0.00130975	0.00208019	1st-AB = pre-AB = 2nd-AB = post-AB = other Subjects
176	MAGAININ A	0.00130975	0.00208019	1st-AB = pre-AB = 2nd-AB = post-AB = other Subjects
177	MAGAININ B	0.00130975	0.00208019	1st-AB = pre-AB = 2nd-AB = post-AB = other Subjects
178	MAGAININ G	0.00130975	0.00208019	1st-AB = pre-AB = 2nd-AB = post-AB = other Subjects
179	MAGAININ H	0.00130975	0.00208019	1st-AB = pre-AB = 2nd-AB = post-AB = other Subjects
180	MOENOMYCIN	0.00130975	0.00208019	1st-AB = pre-AB = 2nd-AB = post-AB = other Subjects
181	MOENOMYCIN A1	0.00130975	0.00208019	1st-AB = pre-AB = 2nd-AB = post-AB = other Subjects
182	PEPTIDE ANTIBIOTIC	0.00130975	0.00208019	1st-AB = pre-AB = 2nd-AB = post-AB = other Subjects
183	TEIXOBACTIN	0.00130975	0.00208019	1st-AB = pre-AB = 2nd-AB = post-AB = other Subjects
184	THIOSTREPTON	0.00130975	0.00208019	1st-AB = pre-AB = 2nd-AB = post-AB = other Subjects
185	THUSIN	0.00130975	0.00208019	1st-AB = pre-AB = 2nd-AB = post-AB = other Subjects
186	TUBERACTINOMYCIN	0.00130975	0.00208019	1st-AB = pre-AB = 2nd-AB = post-AB = other Subjects
187	VIOMYCIN	0.00130975	0.00208019	1st-AB = pre-AB = 2nd-AB = post-AB = other Subjects
188	AZITHROMYCIN	0.0039704	0.00561529	2nd-AB > other Subjects = post-AB = pre-AB = 1st-AB
189	CARBOMYCIN	0.0039704	0.00561529	2nd-AB > other Subjects = post-AB = pre-AB = 1st-AB
190	CHALCOMYCIN	0.0039704	0.00561529	2nd-AB > other Subjects = post-AB = pre-AB = 1st-AB
191	CLARITHROMYCIN	0.0039704	0.00561529	2nd-AB > other Subjects = post-AB = pre-AB = 1st-AB
192	DIRITHROMYCIN	0.0039704	0.00561529	2nd-AB > other Subjects = post-AB = pre-AB = 1st-AB
193	JOSAMYCIN	0.0039704	0.00561529	2nd-AB > other Subjects = post-AB = pre-AB = 1st-AB
194	KITASAMYCIN	0.0039704	0.00561529	2nd-AB > other Subjects = post-AB = pre-AB = 1st-AB
195	MACROLIDE ANTIBIOTIC	0.0039704	0.00561529	2nd-AB > other Subjects = post-AB = pre-AB = 1st-AB
196	MEGALOMYCIN	0.0039704	0.00561529	2nd-AB > other Subjects = post-AB = pre-AB = 1st-AB
197	METHYMYCIN	0.0039704	0.00561529	2nd-AB > other Subjects = post-AB = pre-AB = 1st-AB
198	MIDECAMYCIN	0.0039704	0.00561529	2nd-AB > other Subjects = post-AB = pre-AB = 1st-AB
199	MYCINAMICIN	0.0039704	0.00561529	2nd-AB > other Subjects = post-AB = pre-AB = 1st-AB
200	NARBOMYCIN	0.0039704	0.00561529	2nd-AB > other Subjects = post-AB = pre-AB = 1st-AB
201	NIDDAMYCIN	0.0039704	0.00561529	2nd-AB > other Subjects = post-AB = pre-AB = 1st-AB
202	OLEANDOMYCIN	0.0039704	0.00561529	2nd-AB > other Subjects = post-AB = pre-AB = 1st-AB
203	PIKROMYCIN	0.0039704	0.00561529	2nd-AB > other Subjects = post-AB = pre-AB = 1st-AB
204	ROKITAMYCIN	0.0039704	0.00561529	2nd-AB > other Subjects = post-AB = pre-AB = 1st-AB
205	ROSARAMICIN	0.0039704	0.00561529	2nd-AB > other Subjects = post-AB = pre-AB = 1st-AB
206	ROXITHROMYCIN	0.0039704	0.00561529	2nd-AB > other Subjects = post-AB = pre-AB = 1st-AB
207	SOLITHROMYCIN	0.0039704	0.00561529	2nd-AB > other Subjects = post-AB = pre-AB = 1st-AB
208	SPIRAMYCIN	0.0039704	0.00561529	2nd-AB > other Subjects = post-AB = pre-AB = 1st-AB
209	TELITHROMYCIN	0.0039704	0.00561529	2nd-AB > other Subjects = post-AB = pre-AB = 1st-AB
210	TYLOSIN	0.0039704	0.00561529	2nd-AB > other Subjects = post-AB = pre-AB = 1st-AB
211	ERYTHROMYCIN	0.00424011	0.0059683	2nd-AB = other Subjects>= post-AB = pre-AB = 1st-AB
212	MULTIDRUG_EFFLUX_PUMP	0.00825514	0.011565	2nd-AB = pre-AB>= post-AB = 1st-AB = other Subjects
213	UNSPECIFIED_BETA_LACTAM	0.00950175	0.0132489	2nd-AB > pre-AB = post-AB = other Subjects > 1st-AB
214	MICROCIN J25	0.0151367	0.0210075	1st-AB = pre-AB = 2nd-AB = post-AB = other Subjects
215	CEFACLOR	0.0217442	0.026418	pre-AB = other Subjects = 1st-AB = 2nd-AB = post-AB
216	CEFADROXIL	0.0217442	0.026418	pre-AB = other Subjects = 1st-AB = 2nd-AB = post-AB
217	CEFALEXIN	0.0217442	0.026418	pre-AB = other Subjects = 1st-AB = 2nd-AB = post-AB
218	CEFALOTIN	0.0217442	0.026418	pre-AB = other Subjects = 1st-AB = 2nd-AB = post-AB
219	CEFAMANDOLE	0.0217442	0.026418	pre-AB = other Subjects = 1st-AB = 2nd-AB = post-AB
220	CEFAZOLIN	0.0217442	0.026418	pre-AB = other Subjects = 1st-AB = 2nd-AB = post-AB
221	CEFDINIR	0.0217442	0.026418	pre-AB = other Subjects = 1st-AB = 2nd-AB = post-AB
222	CEFDITOREN	0.0217442	0.026418	pre-AB = other Subjects = 1st-AB = 2nd-AB = post-AB
223	CEFEPIME	0.0217442	0.026418	pre-AB = other Subjects = 1st-AB = 2nd-AB = post-AB
224	CEFETAMET	0.0217442	0.026418	pre-AB = other Subjects = 1st-AB = 2nd-AB = post-AB
225	CEFIXIME	0.0217442	0.026418	pre-AB = other Subjects = 1st-AB = 2nd-AB = post-AB
226	CEFONICID	0.0217442	0.026418	pre-AB = other Subjects = 1st-AB = 2nd-AB = post-AB
227	CEFOPERAZONE	0.0217442	0.026418	pre-AB = other Subjects = 1st-AB = 2nd-AB = post-AB
228	CEFOTIAM	0.0217442	0.026418	pre-AB = other Subjects = 1st-AB = 2nd-AB = post-AB
229	CEFPODOXIME	0.0217442	0.026418	pre-AB = other Subjects = 1st-AB = 2nd-AB = post-AB
230	CEFPROZIL	0.0217442	0.026418	pre-AB = other Subjects = 1st-AB = 2nd-AB = post-AB
231	CEFRADINE	0.0217442	0.026418	pre-AB = other Subjects = 1st-AB = 2nd-AB = post-AB
232	CEFTAROLINE	0.0217442	0.026418	pre-AB = other Subjects = 1st-AB = 2nd-AB = post-AB
233	CEFTAZIDIME	0.0217442	0.026418	pre-AB = other Subjects = 1st-AB = 2nd-AB = post-AB
234	CEFTIBUTEN	0.0217442	0.026418	pre-AB = other Subjects = 1st-AB = 2nd-AB = post-AB
235	CEFTIOFUR	0.0217442	0.026418	pre-AB = other Subjects = 1st-AB = 2nd-AB = post-AB
236	CEFTIZOXIME	0.0217442	0.026418	pre-AB = other Subjects = 1st-AB = 2nd-AB = post-AB
237	CEFTOBIPROLE	0.0217442	0.026418	pre-AB = other Subjects = 1st-AB = 2nd-AB = post-AB
238	CEFTOLOZANE	0.0217442	0.026418	pre-AB = other Subjects = 1st-AB = 2nd-AB = post-AB
239	CEFTRIAXONE	0.0217442	0.026418	pre-AB = other Subjects = 1st-AB = 2nd-AB = post-AB
240	CEFUROXIME	0.0217442	0.026418	pre-AB = other Subjects = 1st-AB = 2nd-AB = post-AB
241	CEPHALOSPORIN	0.0217442	0.026418	pre-AB = other Subjects = 1st-AB = 2nd-AB = post-AB
242	CEPHAPIRIN	0.0217442	0.026418	pre-AB = other Subjects = 1st-AB = 2nd-AB = post-AB
243	LORACARBEF	0.0217442	0.026418	pre-AB = other Subjects = 1st-AB = 2nd-AB = post-AB
244	MOXALACTAM	0.0217442	0.026418	pre-AB = other Subjects = 1st-AB = 2nd-AB = post-AB
245	ANTIBIOTIC A40926	0.0231269	0.026418	other Subjects = post-AB = pre-AB>= 2nd-AB = 1st-AB
246	ANTIBIOTIC A47934	0.0231269	0.026418	other Subjects = post-AB = pre-AB>= 2nd-AB = 1st-AB
247	AVOPARCIN	0.0231269	0.026418	other Subjects = post-AB = pre-AB>= 2nd-AB = 1st-AB
248	BALHIMYCIN	0.0231269	0.026418	other Subjects = post-AB = pre-AB>= 2nd-AB = 1st-AB
249	BLEOMYCIN	0.0231269	0.026418	other Subjects = post-AB = pre-AB>= 2nd-AB = 1st-AB
250	BLEOMYCIN A2	0.0231269	0.026418	other Subjects = post-AB = pre-AB>= 2nd-AB = 1st-AB
251	BLEOMYCIN B2	0.0231269	0.026418	other Subjects = post-AB = pre-AB>= 2nd-AB = 1st-AB
252	BLEOMYCINIC ACID	0.0231269	0.026418	other Subjects = post-AB = pre-AB>= 2nd-AB = 1st-AB
253	CHLOROEREMOMYCIN	0.0231269	0.026418	other Subjects = post-AB = pre-AB>= 2nd-AB = 1st-AB
254	DALBAVANCIN	0.0231269	0.026418	other Subjects = post-AB = pre-AB>= 2nd-AB = 1st-AB
255	GLYCOPEPTIDE ANTIBIOTIC	0.0231269	0.026418	other Subjects = post-AB = pre-AB>= 2nd-AB = 1st-AB
256	ORITAVANCIN	0.0231269	0.026418	other Subjects = post-AB = pre-AB>= 2nd-AB = 1st-AB
257	RISTOCETIN	0.0231269	0.026418	other Subjects = post-AB = pre-AB>= 2nd-AB = 1st-AB
258	TEICOPLANIN	0.0231269	0.026418	other Subjects = post-AB = pre-AB>= 2nd-AB = 1st-AB
259	TELAVANCIN	0.0231269	0.026418	other Subjects = post-AB = pre-AB>= 2nd-AB = 1st-AB
260	VANCOMYCIN	0.0231269	0.026418	other Subjects = post-AB = pre-AB>= 2nd-AB = 1st-AB
261	AMINONUCLEOSIDE ANTIBIOTIC	0.0259372	0.0290693	post-AB = 2nd-AB = other Subjects = pre-AB = 1st-AB
262	NUCLEOSIDE ANTIBIOTIC	0.0259372	0.0290693	post-AB = 2nd-AB = other Subjects = pre-AB = 1st-AB
263	PUROMYCIN	0.0259372	0.0290693	post-AB = 2nd-AB = other Subjects = pre-AB = 1st-AB
264	STREPTOTHRICIN	0.0259372	0.0290693	post-AB = 2nd-AB = other Subjects = pre-AB = 1st-AB
265	TUNICAMYCIN	0.0259372	0.0290693	post-AB = 2nd-AB = other Subjects = pre-AB = 1st-AB
266	TETRACYCLINE	0.0907003	0.0983693	2nd-AB = post-AB = pre-AB = other Subjects = 1st-AB
267	CHLORTETRACYCLINE	0.0907515	0.0983693	2nd-AB = pre-AB = other Subjects = post-AB = 1st-AB
268	DEMECLOCYCLINE	0.0907515	0.0983693	2nd-AB = pre-AB = other Subjects = post-AB = 1st-AB
269	DOXYCYCLINE	0.0907515	0.0983693	2nd-AB = pre-AB = other Subjects = post-AB = 1st-AB
270	ERAVACYCLINE	0.0907515	0.0983693	2nd-AB = pre-AB = other Subjects = post-AB = 1st-AB
271	MINOCYCLINE	0.0907515	0.0983693	2nd-AB = pre-AB = other Subjects = post-AB = 1st-AB
272	OMADACYCLINE	0.0907515	0.0983693	2nd-AB = pre-AB = other Subjects = post-AB = 1st-AB
273	OXYTETRACYCLINE	0.0907515	0.0983693	2nd-AB = pre-AB = other Subjects = post-AB = 1st-AB
274	TETRACYCLINE DERIVATIVE	0.0907515	0.0983693	2nd-AB = pre-AB = other Subjects = post-AB = 1st-AB
275	GLYCYLCYCLINE	0.0921383	0.0991488	2nd-AB = post-AB = pre-AB = other Subjects = 1st-AB
276	TIGECYCLINE	0.0921383	0.0991488	2nd-AB = post-AB = pre-AB = other Subjects = 1st-AB
277	AZIDAMFENICOL	0.100729	0.106465	pre-AB = post-AB = other Subjects = 2nd-AB = 1st-AB
278	CHLORAMPHENICOL	0.100729	0.106465	pre-AB = post-AB = other Subjects = 2nd-AB = 1st-AB
279	FLORFENICOL	0.100729	0.106465	pre-AB = post-AB = other Subjects = 2nd-AB = 1st-AB
280	PHENICOL ANTIBIOTIC	0.100729	0.106465	pre-AB = post-AB = other Subjects = 2nd-AB = 1st-AB
281	THIAMPHENICOL	0.100729	0.106465	pre-AB = post-AB = other Subjects = 2nd-AB = 1st-AB
282	AMINOCOUMARIN ANTIBIOTIC	0.137289	0.143573	1st-AB = post-AB = other Subjects = pre-AB = 2nd-AB
283	CLOROBIOCIN	0.137289	0.143573	1st-AB = post-AB = other Subjects = pre-AB = 2nd-AB
284	COUMERMYCIN A1	0.137289	0.143573	1st-AB = post-AB = other Subjects = pre-AB = 2nd-AB
285	NOVOBIOCIN	0.139377	0.145246	1st-AB = pre-AB = post-AB = other Subjects = 2nd-AB
286	MAFENIDE	0.27797	0.279855	pre-AB = post-AB = other Subjects = 1st-AB = 2nd-AB
287	SULFACETAMIDE	0.27797	0.279855	pre-AB = post-AB = other Subjects = 1st-AB = 2nd-AB
288	SULFADIAZINE	0.27797	0.279855	pre-AB = post-AB = other Subjects = 1st-AB = 2nd-AB
289	SULFADIMIDINE	0.27797	0.279855	pre-AB = post-AB = other Subjects = 1st-AB = 2nd-AB
290	SULFADOXINE	0.27797	0.279855	pre-AB = post-AB = other Subjects = 1st-AB = 2nd-AB
291	SULFAMETHIZOLE	0.27797	0.279855	pre-AB = post-AB = other Subjects = 1st-AB = 2nd-AB
292	SULFAMETHOXAZOLE	0.27797	0.279855	pre-AB = post-AB = other Subjects = 1st-AB = 2nd-AB
293	SULFASALAZINE	0.27797	0.279855	pre-AB = post-AB = other Subjects = 1st-AB = 2nd-AB
294	SULFISOXAZOLE	0.27797	0.279855	pre-AB = post-AB = other Subjects = 1st-AB = 2nd-AB
295	SULFONAMIDE ANTIBIOTIC	0.27797	0.279855	pre-AB = post-AB = other Subjects = 1st-AB = 2nd-AB
296	BENZALKONIUM CHLORIDE	0.976802	0.976802	other Subjects = pre-AB = 1st-AB = 2nd-AB = post-AB
297	RHODAMINE	0.976802	0.976802	other Subjects = pre-AB = 1st-AB = 2nd-AB = post-AB

## Sheet: Legend
Suppl. Table 13: Functional differences between stages in antibiotics treatment ARG (antibiotic resistance gene) and ARC (antibiotic resistance class) differences Kruskal-Wallis test (p-values), with correction for multiple testing (q-value), as well as post-hoc tests for differences between specific sample subsets. 1st-AB refers to the first response stage samples after Ceftriaxone treatment (n=…
